# Supplementary material for: Studying Ancient Anthropogenic Impacts on Current Floral Biodiversity in the Southern Levant as reflected by the Philistine Migration
Source: PubMed Central journal article supplement (PMC4642518; doi:10.1038/srep13308), 2015-08-25
Supplement: srep13308-s1.pdf [file srep13308-s1.pdf]

## Supplementary Information

### Studying Ancient Anthropogenic Impacts on Current Floral Biodiversity in the Southern Levant as reflected by the Philistine Migration

Suembikya Frumin<sup>1</sup>, Aren M. Maeir<sup>1</sup>, Liora Kolska Horwitz<sup>2</sup> & Ehud Weiss<sup>1</sup>

**Table S1: Structure of archaeobotanical data for Bronze and Iron Age Sites.**

| Site Name   | Bronze Age                                                                  |         |                  | Iron Age |                                                                                  |         |                  |
|-------------|-----------------------------------------------------------------------------|---------|------------------|----------|----------------------------------------------------------------------------------|---------|------------------|
|             | Contexts                                                                    | NN Taxa | NN Plant Remains | Culture  | Context                                                                          | NN Taxa | NN Plant Remains |
| Afula       | Pit, 3 other loci                                                           | 9       | no data          | nonPhil  | Storage jars                                                                     | 6       | 41               |
| Aphek       | Halls in building, governor palace, street, winepress                       | 81      | 29180            | Phil     | Building, dump pits, threshing floor                                             | 110     | 3620             |
|             |                                                                             |         |                  | nonPhil  | Settlement, 5 pits, silos, intact jars with grains                               | 50      | 21398            |
| Arad        | Various strata within building - kitchen-storeroom, bins, pithoi, jars      | 22      | 60 kg            | nonPhil  | Various loci from occupation layers                                              | 5       | >61              |
| Ashdod      | 2 loci from occupation levels and installation, refuse dump by installation | 9       | 713              | 0        |                                                                                  | 0       |                  |
| Ashkelon    |                                                                             | 0       |                  | Phil     | Administrative center, counting house, shops, streets, silo, warehouse magazines | 178     | 19,543           |
| Be'er Sheba |                                                                             | 0       |                  | nonPhil  | Various loci from occupation Layers                                              | 5       | ca 30            |
| Beth Shean  | Occupation strata, 13 L                                                     | 53      | 36768            | nonPhil  | Building, destruction debris on floor                                            | 33      | 150559           |

|               |                                                                                                                |    |                     |         |                                                                                             |    |         |
|---------------|----------------------------------------------------------------------------------------------------------------|----|---------------------|---------|---------------------------------------------------------------------------------------------|----|---------|
| City of David |                                                                                                                | 0  |                     | nonPhil | Occupation Layers                                                                           | 12 | no data |
| Dalit         | Domestic area                                                                                                  | 1  | no data             | 0       |                                                                                             | 0  |         |
| Ekron         | Destruction debris, vessel, storage jar                                                                        | 51 | 924                 | Phil    | Room floor, pit, fill, fireplaces                                                           | 91 | 6940    |
| Rosh Zayit    |                                                                                                                | 0  |                     | nonPhil | Jars in storeroom                                                                           | 40 | 184440  |
| Ifshar        | Grain` storeroom, food prep. area, courtyard                                                                   | 11 | 32106               | nonPhil | Storage pit near house, 2 other storage pits                                                | 15 | 847     |
| Jericho       | silo, 7 tombs, room, pot, 3 shafts, etc.                                                                       | 56 | ND                  | 0       |                                                                                             | 0  |         |
| Kedesh        |                                                                                                                | 0  |                     | nonPhil | Pit sealed under floor                                                                      | 1  | 2       |
| Keisan        |                                                                                                                | 0  |                     | nonPhil | Silo                                                                                        | 9  | 5235    |
| Lachish       | ND                                                                                                             | 12 | 167 cm <sup>3</sup> | nonPhil | ND                                                                                          | 10 | 300 cm3 |
| Manahat       | Sealed contexts on floor, fireplaces and around them                                                           | 17 | 411                 | 0       |                                                                                             | 0  |         |
| Megiddo       | Accumulation on floors, pits, bone accumulation in the temple compound, burials, refuse deposit, plaster floor | 28 | 816                 | nonPhil | Floors, pits, various installations, buildings. floor, destruction layer, large storage jar | 23 | 348     |
| Qasile        |                                                                                                                | 0  |                     | Phil    | Destruction debris under temple, and adjacent 2 buildings                                   | 16 | 13303   |
| Ramat Matred  |                                                                                                                | 0  |                     | nonPhil | Occupation Layers                                                                           | 1  | 1       |
| Safi/Gath     | Accumulation floor in building, room                                                                           | 15 | 249                 | Phil    | Destruction debris, room floor                                                              | 34 | 1003    |
| Shiloh        | ND, 8 loci                                                                                                     | 21 | 357                 | nonPhil | Silo, 2 loci out of 74 loci                                                                 | 33 | 22952   |
| Shiqmim       | 22 samples - lower village building phase                                                                      | 5  | 22                  | 0       |                                                                                             | 0  |         |
| Ta`anach      | ND, 7 loci                                                                                                     | 19 | ND                  | nonPhil | ND, 6 loci                                                                                  | 9  | ND      |

|        |                                           |    |        |         |                  |   |     |
|--------|-------------------------------------------|----|--------|---------|------------------|---|-----|
| Batash | Building, sealed jar, etc at least 3 loci | 55 | 220761 | nonPhil | ND, 10 loci      | 1 | ND  |
|        |                                           |    |        | Phil    | ND, 9 loci       | 1 | ND  |
| Rehov  |                                           | 0  |        | nonPhil | 9 different loci | 1 | 200 |

Each site is characterized by time period (Bronze Age and Iron Age), cultural affinity of Iron Age Strata (Philistine or non-Philistine), context contained remains of seeds and fruits, number of taxa recognized, and number of plant remains analyzed. Phil – Philistine Strata; nonPhil – other than Philistine Strata within the Iron Age. ND – no data in publication.

**Table S2: The archaeobotanical record of Southern Levant in Bronze and Iron Ages.** Data based on studies of remnants of flowers, fruits, and seeds. Species ecology is denoted as cult = cultivated species; w/w = wild and/ or weed species. Iron Age Aphek contains both Philistine (Phil) and non-Philistine (nonPhil) strata.

| List of Taxa                         | Ecology | Bronze Age                                                               | Iron Age Phil                                                                                     | Iron Age nonPhil                              |
|--------------------------------------|---------|--------------------------------------------------------------------------|---------------------------------------------------------------------------------------------------|-----------------------------------------------|
| <i>Adonis</i> sp.                    |         | Aphek <sup>1,2</sup><br>Manahat <sup>3</sup><br>Safi/Gath <sup>2,4</sup> | Aphek <sup>1,2</sup><br>Ashkelon <sup>2,5</sup><br>Safi/Gath <sup>2,4</sup>                       | -                                             |
| <i>Adonis dentata</i>                | w/w     | Shiqmim <sup>6</sup>                                                     | -                                                                                                 | -                                             |
| <i>Adonis dentata/microcarpa</i>     | w/w     | -                                                                        | Ashkelon <sup>5</sup>                                                                             | -                                             |
| <i>Aegilops geniculata/peregrina</i> | w/w     | -                                                                        | -                                                                                                 | Beth Shean <sup>7</sup>                       |
| <i>Aegilops</i> sp.                  | w/w     | Shiqmim <sup>6</sup>                                                     | Ashkelon <sup>5</sup>                                                                             | -                                             |
| <i>Aira elengatissima</i>            | w/w     | -                                                                        | Safi/Gath <sup>2,4</sup>                                                                          | -                                             |
| <i>Alkanna strigosa</i>              | w/w     | -                                                                        | -                                                                                                 | Beth Shean <sup>7</sup>                       |
| <i>Amaranthus</i> sp.                | w/w     | -                                                                        | -                                                                                                 | Megiddo <sup>8</sup>                          |
|                                      |         |                                                                          |                                                                                                   |                                               |
| <i>Ammi majus</i>                    | w/w     | -                                                                        | Aphek <sup>1,2</sup>                                                                              | -                                             |
| <i>Amygdalus communis</i>            | w/w     | Ta'anach <sup>9</sup>                                                    | Ashkelon <sup>10,11,5</sup>                                                                       | City of David <sup>12</sup>                   |
| <i>Anagallis arvensis/foemina</i>    | w/w     | -                                                                        | Ashkelon <sup>2</sup>                                                                             | -                                             |
| <i>Anagallis arvensis</i>            | w/w     | Aphek <sup>1,2</sup>                                                     | Aphek <sup>1,2</sup><br>Ashkelon <sup>2,5</sup><br>Ekron <sup>2</sup><br>Safi/Gath <sup>2,4</sup> | Aphek <sup>2</sup><br>Beth Shean <sup>7</sup> |
| <i>Anagallis</i> sp.                 | w/w     | Megiddo <sup>8</sup>                                                     | -                                                                                                 | Megiddo <sup>8</sup>                          |
| <i>Androcymbium palaestinum</i>      | w/w     | -                                                                        | Ashkelon <sup>5</sup>                                                                             | -                                             |
| <i>Anthemis bornmuelleri</i>         | w/w     | -                                                                        | Ekron <sup>2</sup>                                                                                | -                                             |
| <i>Anthemis cotula/parvifolia</i>    | w/w     | -                                                                        | Ashkelon <sup>5</sup>                                                                             | -                                             |
| <i>Anthemis palestina</i>            | w/w     | Batash <sup>13</sup>                                                     | Ashkelon <sup>2</sup>                                                                             | -                                             |
| <i>Anthemis pseudocotula</i>         | w/w     | -                                                                        | Ashkelon <sup>2,10,11,5</sup><br>Ekron <sup>2</sup>                                               | -                                             |
| <i>Anthemis tinctoria</i>            | w/w     | Beth Shean <sup>14</sup>                                                 | -                                                                                                 | -                                             |
| <i>Apium graveolens</i>              | w/w     | Beth Shean <sup>14</sup>                                                 | -                                                                                                 | -                                             |
| <i>Apium nodiflorum</i>              | w/w     | -                                                                        | Aphek <sup>1,2</sup>                                                                              | Aphek <sup>1,2</sup>                          |
| <i>Arnebia decumbens</i>             | w/w     | Shiqmim <sup>6</sup>                                                     | Ashkelon <sup>10,11,5</sup>                                                                       | -                                             |
| <i>Arrhenatherum palaestinum</i>     | w/w     | -                                                                        | Ekron <sup>2</sup>                                                                                | -                                             |

|                                                     |     |                                                                                                                                                                              |                                                                                                 |                                                                                                     |
|-----------------------------------------------------|-----|------------------------------------------------------------------------------------------------------------------------------------------------------------------------------|-------------------------------------------------------------------------------------------------|-----------------------------------------------------------------------------------------------------|
| <i>Arundo</i> sp.                                   |     | -                                                                                                                                                                            | Ekron <sup>2</sup>                                                                              | -                                                                                                   |
| <i>Asperula arvensis/Galium tricornutum</i>         | w/w | Batash <sup>13</sup>                                                                                                                                                         | -                                                                                               | -                                                                                                   |
| <i>Asperula</i> sp.                                 |     | Batash <sup>13</sup>                                                                                                                                                         | -                                                                                               | -                                                                                                   |
| <i>Asphodelus tenuifolius</i>                       | w/w | -                                                                                                                                                                            | Ashkelon <sup>2</sup>                                                                           | -                                                                                                   |
| <i>Astragalus asterias</i>                          | w/w | Aphek <sup>1,2</sup>                                                                                                                                                         | Aphek <sup>1,2</sup><br>Ashkelon <sup>2</sup>                                                   | Aphek <sup>2</sup>                                                                                  |
| <i>Astragalus hamosus</i>                           | w/w | -                                                                                                                                                                            | Aphek <sup>1,2</sup><br>Ekron <sup>2</sup>                                                      | -                                                                                                   |
| <i>Astragalus macrocarpus/aleppicus</i>             | w/w | -                                                                                                                                                                            | Ekron <sup>2</sup>                                                                              | -                                                                                                   |
| <i>Astragalus</i> sp.                               |     | Aphek <sup>1,2</sup><br>Ifshar <sup>15, 16</sup><br>Safi/Gath <sup>2,4</sup>                                                                                                 | Aphek <sup>1,2</sup><br>Ashkelon <sup>5</sup><br>Ekron <sup>2</sup><br>Safi/Gath <sup>2,4</sup> | -                                                                                                   |
| <i>Avena barbata</i>                                | w/w | Aphek <sup>1,2</sup><br>Batash <sup>13</sup>                                                                                                                                 | Aphek <sup>1,2</sup><br>Ashkelon <sup>2,5</sup>                                                 | -                                                                                                   |
| <i>Avena barbata/sterilis</i>                       | w/w | Aphek <sup>1,2</sup>                                                                                                                                                         | Aphek <sup>1,2</sup>                                                                            | Aphek <sup>1,2</sup>                                                                                |
| <i>Avena sterilis</i>                               | w/w | Aphek <sup>1,2</sup><br>Batash <sup>13</sup><br>Ekron <sup>2</sup>                                                                                                           | -                                                                                               | Aphek <sup>1,2</sup>                                                                                |
| <i>Avena</i> sp.                                    |     | Afula <sup>17</sup><br>Batash <sup>13</sup><br>Beth Shean <sup>14</sup><br>Ifshar <sup>15, 16</sup><br>Jericho <sup>18</sup><br>Manahat <sup>3</sup><br>Shiqmim <sup>6</sup> | Ekron <sup>2</sup>                                                                              | Rosh Zayit <sup>19</sup><br>Shiloh <sup>20</sup>                                                    |
| <i>Bellevalia eigii/flexuosa/warburgii</i>          | w/w | -                                                                                                                                                                            | Ashkelon <sup>5</sup>                                                                           | -                                                                                                   |
| <i>Bellevalia flexuosa</i>                          | w/w | Aphek <sup>1,2</sup>                                                                                                                                                         | Aphek <sup>1,2</sup><br>Ashkelon <sup>2,5</sup><br>Ekron <sup>2</sup>                           | Rosh Zayit <sup>19</sup>                                                                            |
| <i>Bellevalia</i> sp. and <i>Bellevalia/Muscari</i> |     | Aphek <sup>2</sup><br>Batash <sup>13</sup>                                                                                                                                   | Ashkelon <sup>2</sup><br>Ekron <sup>2</sup>                                                     | Aphek <sup>1,2</sup><br>Beth Shean <sup>7</sup><br>Shiloh <sup>20</sup>                             |
| <i>Beta vulgaris</i>                                | w/w | Aphek <sup>1,2</sup>                                                                                                                                                         | Aphek <sup>1,2</sup><br>Ashkelon <sup>2,5</sup>                                                 | -                                                                                                   |
| <i>Brachypodium distachyon</i>                      | w/w | Aphek <sup>1,2</sup><br>Ekron <sup>2</sup>                                                                                                                                   | Aphek <sup>1,2</sup><br>Ashkelon <sup>2,5</sup><br>Ekron <sup>2</sup>                           | Aphek <sup>1,2</sup><br>Beth Shean <sup>7</sup><br>Rosh Zayit <sup>19</sup><br>Shiloh <sup>20</sup> |
| <i>Brassica nigra</i>                               | w/w | Ekron <sup>2</sup>                                                                                                                                                           | Aphek <sup>1,2</sup>                                                                            | -                                                                                                   |
| <i>Bromus alopecuroides</i>                         | w/w | Aphek <sup>1,2</sup>                                                                                                                                                         | -                                                                                               | -                                                                                                   |
| <i>Bromus alopecuroides/lanceolatus</i>             | w/w | -                                                                                                                                                                            | -                                                                                               | Rosh Zayit <sup>19</sup>                                                                            |
| <i>Bromus diandrus</i>                              | w/w | -                                                                                                                                                                            | Aphek <sup>1,2</sup>                                                                            | -                                                                                                   |
| <i>Bromus tigris/pseudobrachystachys</i>            |     | -                                                                                                                                                                            | Aphek <sup>1,2</sup>                                                                            | -                                                                                                   |
| <i>Bromus</i> sp.                                   |     | Aphek <sup>1,2</sup><br>Arad <sup>21</sup><br>Batash <sup>13</sup><br>Jericho <sup>18</sup>                                                                                  | Aphek <sup>1</sup><br>Ashkelon <sup>2,5</sup><br>Ekron <sup>2</sup>                             | Megiddo <sup>8</sup>                                                                                |
| <i>Buglossoides arvensis</i>                        | w/w | -                                                                                                                                                                            | Ashkelon <sup>2, 10, 11, 5</sup><br>Ekron <sup>2</sup>                                          | Beth Shean <sup>7</sup>                                                                             |
| <i>Buglossoides tenuiflora</i>                      | w/w | Beth Shean <sup>14</sup>                                                                                                                                                     | Ashkelon <sup>2, 5</sup><br>Ekron <sup>2</sup>                                                  | -                                                                                                   |
| <i>Bupleurum lancifolium</i>                        | w/w | Beth Shean <sup>14</sup><br>Ifshar <sup>15, 16</sup>                                                                                                                         | Ashkelon <sup>5</sup>                                                                           | Beth Shean <sup>7</sup><br>Rosh Zayit <sup>19</sup><br>Shiloh <sup>13</sup>                         |

|                                                    |      |                                                                                                                             |                                                                                                   |                                                                                                                         |
|----------------------------------------------------|------|-----------------------------------------------------------------------------------------------------------------------------|---------------------------------------------------------------------------------------------------|-------------------------------------------------------------------------------------------------------------------------|
| <i>Bupleurum subovatum</i>                         | w/w  | Aphek <sup>1,2</sup><br>Batash <sup>13</sup><br>Ekron <sup>2</sup><br>Safi/Gath <sup>2,4</sup>                              | Aphek <sup>1,2</sup><br>Ashkelon <sup>2,5</sup><br>Ekron <sup>2</sup><br>Safi/Gath <sup>2,4</sup> | Aphek <sup>1,2</sup>                                                                                                    |
| <i>Calendula arvensis</i>                          | w/w  | Beth Shean <sup>14</sup>                                                                                                    | -                                                                                                 | -                                                                                                                       |
| <i>Calendula</i> sp.                               | w/w  | Jericho <sup>18</sup>                                                                                                       | -                                                                                                 | Beth Shean <sup>7</sup>                                                                                                 |
| <i>Capparis spinosa</i>                            | w/w  | Beth Shean <sup>14</sup><br>Ta'anach <sup>9</sup>                                                                           | Aphek <sup>1,2,5</sup> Ashkelon <sup>2</sup>                                                      | Ta'anach <sup>9</sup>                                                                                                   |
| <i>Carex divisa</i>                                | w/w  | -                                                                                                                           | Ekron <sup>2</sup>                                                                                | -                                                                                                                       |
| <i>Carex hallerana</i>                             | w/w  | -                                                                                                                           | Ekron <sup>2</sup>                                                                                | -                                                                                                                       |
| <i>Carthamus</i> sp.                               |      | -                                                                                                                           | Ashkelon <sup>2,5</sup>                                                                           | -                                                                                                                       |
| <i>Catabrosa aquatica</i>                          | w/w  | -                                                                                                                           | Ekron <sup>2</sup>                                                                                | -                                                                                                                       |
| <i>Celtis australis</i>                            | cult | -                                                                                                                           | -                                                                                                 | Rehov <sup>22</sup>                                                                                                     |
| <i>Centaurea crocodylium</i>                       | w/w  | -                                                                                                                           | -                                                                                                 | Shiloh <sup>20</sup>                                                                                                    |
| <i>Centaurea iberica</i>                           | w/w  | Aphek <sup>1,2</sup>                                                                                                        | -                                                                                                 | -                                                                                                                       |
| <i>Centaurea iberica/hyalolepis</i>                | w/w  | Batash <sup>13</sup>                                                                                                        | -                                                                                                 | -                                                                                                                       |
| <i>Centaurea pallescens</i>                        | w/w  | -                                                                                                                           | Ashkelon <sup>2</sup><br>Ekron <sup>2</sup>                                                       | -                                                                                                                       |
| <i>Centaurea procurrens</i>                        | w/w  | -                                                                                                                           | Aphek <sup>1,2</sup>                                                                              | -                                                                                                                       |
| <i>Centaurea procurrens/glomerata</i>              | w/w  | -                                                                                                                           | Aphek <sup>2</sup>                                                                                | -                                                                                                                       |
| <i>Centaurea verutum</i>                           | w/w  | Batash <sup>13</sup>                                                                                                        | -                                                                                                 | -                                                                                                                       |
| <i>Centaurea</i> sp.                               | w/w  | Jericho <sup>18</sup>                                                                                                       | -                                                                                                 | -                                                                                                                       |
| <i>Cephalaria joppensis</i>                        | w/w  | Batash <sup>13</sup>                                                                                                        | Ashkelon <sup>2,5</sup>                                                                           | Keisan <sup>23</sup><br>Rosh Zayit <sup>19</sup>                                                                        |
| <i>Cephalaris joppensis/syriaca</i>                | w/w  | Ekron <sup>2</sup>                                                                                                          | Ekron <sup>2</sup>                                                                                | -                                                                                                                       |
| <i>Cephalaria syriaca</i>                          | w/w  | Batash <sup>13</sup><br>Ifshar <sup>15,16</sup>                                                                             | Aphek <sup>1,2</sup>                                                                              | Afula <sup>24</sup><br>Aphek <sup>1,2</sup><br>Beth Shean <sup>25</sup><br>Keisan <sup>23</sup><br>Shiloh <sup>20</sup> |
| <i>Cephalaria</i> sp.                              | w/w  | -                                                                                                                           | Ashkelon <sup>2,5</sup><br>Safi/Gath <sup>2,4</sup>                                               | -                                                                                                                       |
| <i>Ceratonia siliqua</i>                           | cult | -                                                                                                                           | Ashkelon <sup>10,11,5</sup>                                                                       | -                                                                                                                       |
| <i>Chenopodium murale</i>                          | w/w  | Aphek <sup>1,2</sup><br>Beth Shean <sup>14</sup><br>Ekron <sup>2</sup>                                                      | Aphek <sup>1,2</sup><br>Ashkelon <sup>2,10,11,5</sup><br>Ekron <sup>2</sup>                       | Rosh Zayit <sup>19</sup>                                                                                                |
| <i>Chenopodium murale/vulvaria</i>                 | w/w  | Aphek <sup>1</sup>                                                                                                          | Aphek <sup>1,2</sup>                                                                              | Aphek <sup>2</sup>                                                                                                      |
| <i>Chrozophora</i> sp.                             | w/w  | Megiddo <sup>8</sup>                                                                                                        | Aphek <sup>1,2</sup><br>Ekron <sup>2</sup>                                                        | -                                                                                                                       |
| <i>Chrysanthemum coronarium</i>                    | w/w  | Aphek <sup>1,2</sup><br>Beth Shean <sup>14</sup>                                                                            | Aphek <sup>1,2</sup><br>Ashkelon <sup>2,5</sup><br>Ekron <sup>2</sup><br>Safi/Gath <sup>2,4</sup> | Aphek <sup>1,2</sup>                                                                                                    |
| <i>Cicer arietinum</i>                             | cult | Arad <sup>21</sup><br>Beth Shean <sup>14</sup><br>Ifshar <sup>15,16</sup><br>Jericho <sup>18</sup><br>Lachish <sup>26</sup> | Ashkelon <sup>10,11,5</sup>                                                                       | Afula <sup>24</sup><br>Lachish <sup>26</sup>                                                                            |
| <i>Cicer pinnatifidum</i>                          | w/w  | Afula <sup>17</sup>                                                                                                         | Ashkelon <sup>2,5</sup>                                                                           | -                                                                                                                       |
| <i>Cichorium endivia</i>                           | w/w  | -                                                                                                                           | Aphek <sup>1</sup><br>Ekron <sup>2</sup>                                                          | -                                                                                                                       |
| <i>Cichorium endivia</i> subsp. <i>divaricatum</i> | w/w  | -                                                                                                                           | Aphek <sup>2</sup>                                                                                | -                                                                                                                       |
| <i>Cichorium pumilum</i>                           | w/w  | -                                                                                                                           | Ashkelon <sup>5</sup>                                                                             | -                                                                                                                       |

|                                            |      |                                                                        |                                                                          |                          |
|--------------------------------------------|------|------------------------------------------------------------------------|--------------------------------------------------------------------------|--------------------------|
| <i>Citrullus colocynthis</i>               | w/w  | -                                                                      | -                                                                        | Arad <sup>27</sup>       |
| <i>Cladium mariscus</i>                    | w/w  | -                                                                      | Ashkelon <sup>10, 11, 5</sup>                                            | -                        |
| <i>Conium maculatum</i>                    | w/w  | Aphek <sup>1, 2</sup>                                                  | -                                                                        | -                        |
| <i>Consolida incana</i>                    | w/w  | -                                                                      | -                                                                        | Rosh Zayit <sup>19</sup> |
| <i>Convolvulus arvensis</i>                | w/w  | Batash <sup>13</sup>                                                   | -                                                                        | Rosh Zayit <sup>19</sup> |
| <i>Convolvulus oleifolius</i>              | w/w  | -                                                                      | Aphek <sup>1, 2</sup>                                                    | -                        |
| <i>Convolvulus secundus</i>                | w/w  | -                                                                      | Ashkelon <sup>2, 5</sup>                                                 | Aphek <sup>1, 2</sup>    |
| <i>Convolvulus</i> sp.                     | w/w  | Ekron <sup>2</sup>                                                     | Ashkelon <sup>2</sup>                                                    | -                        |
| <i>Coriandrum sativum</i>                  | w/w  | -                                                                      | Ashkelon <sup>2</sup><br>Ekron <sup>2</sup>                              | -                        |
| <i>Coronilla cretica</i>                   | w/w  | -                                                                      | -                                                                        | Rosh Zayit <sup>19</sup> |
| <i>Coronilla repanda</i>                   | w/w  | Ekron <sup>2</sup>                                                     | -                                                                        | -                        |
| <i>Coronilla repanda/scorpioides</i>       | w/w  | -                                                                      | -                                                                        | Shiloh <sup>20</sup>     |
| <i>Coronilla scorpioides</i>               | w/w  | Aphek <sup>1, 2</sup>                                                  | Aphek <sup>1, 2</sup><br>Ekron <sup>2</sup>                              | Aphek <sup>1, 2</sup>    |
| <i>Coronilla</i> sp.                       | w/w  | Ekron <sup>2</sup>                                                     | Ekron <sup>2</sup><br>Safi/Gath <sup>2, 4</sup>                          | -                        |
| <i>Crataegus</i> sp.                       |      | Lachish <sup>26</sup>                                                  | -                                                                        | -                        |
| <i>Crepis aspera</i>                       | w/w  | -                                                                      | -                                                                        | Rosh Zayit <sup>19</sup> |
| <i>Crucianella</i> sp.                     |      | -                                                                      | Ashkelon <sup>5</sup>                                                    | -                        |
| <i>Cuminum cyminum</i>                     | cult | -                                                                      | Aphek <sup>1, 2</sup>                                                    | -                        |
| <i>Cutandia maritima</i>                   | w/w  | -                                                                      | Ashkelon <sup>2</sup>                                                    | -                        |
| <i>Cynodon dactylon</i>                    | w/w  | -                                                                      | Ashkelon <sup>5</sup>                                                    | Rosh Zayit <sup>19</sup> |
| <i>Dactylis glomerata</i>                  | w/w  | Aphek <sup>1, 2</sup><br>Ekron <sup>2</sup>                            | -                                                                        | -                        |
| <i>Daucus broteri</i>                      | w/w  | Batash <sup>13</sup>                                                   | Aphek <sup>1, 2</sup>                                                    | -                        |
| <i>Daucus carota</i> subsp. <i>maximus</i> | w/w  | -                                                                      | Ashkelon <sup>2, 5</sup><br>Aphek <sup>1, 2</sup>                        | -                        |
| <i>Echinochloa colonum</i>                 | w/w  | -                                                                      | Ashkelon <sup>2</sup>                                                    | -                        |
| <i>Echiochilon fruticosum</i>              | w/w  | -                                                                      | Ashkelon <sup>2, 10, 11, 5</sup>                                         | -                        |
| <i>Echium angustifolium/judaeum</i>        |      | Safi/Gath <sup>2, 4</sup>                                              | Ashkelon <sup>2</sup><br>Ekron <sup>2</sup><br>Safi/Gath <sup>2, 4</sup> | -                        |
| <i>Echium judaeum</i>                      | w/w  | Jericho <sup>18</sup><br>Megiddo <sup>8</sup><br>Ta'anach <sup>9</sup> | Ashkelon <sup>5</sup>                                                    | Ta'anach <sup>9</sup>    |
| <i>Eleocharis palustris</i>                | w/w  | -                                                                      | Ashkelon <sup>2</sup>                                                    | -                        |
| <i>Emex spinosa</i>                        | w/w  | Aphek <sup>1, 2</sup>                                                  | Ashkelon <sup>2, 5</sup>                                                 | -                        |
| <i>Eragrostis barrelieri/pilosa</i>        | w/w  | -                                                                      | Ashkelon <sup>2</sup>                                                    | -                        |
| <i>Eragrostis pilosa</i>                   | w/w  | -                                                                      | Ekron <sup>2</sup>                                                       | -                        |
| <i>Erodium botrys</i>                      | w/w  | -                                                                      | Ekron <sup>2</sup>                                                       | -                        |
| <i>Erodium moschatum</i>                   | w/w  | -                                                                      | Ashkelon <sup>2</sup><br>Aphek <sup>1, 2</sup>                           | -                        |
| <i>Erucaria hispanica</i>                  | w/w  | Batash <sup>13</sup>                                                   | -                                                                        | -                        |
| <i>Erucaria microcarpa</i>                 | w/w  | -                                                                      | Ashkelon <sup>10, 11, 5</sup>                                            | -                        |
| <i>Euphorbia helioscopia</i>               | w/w  | -                                                                      | Aphek <sup>1, 2</sup><br>Qasile <sup>28</sup>                            | -                        |
| <i>Euphorbia peplus</i>                    | w/w  | Aphek <sup>1, 2</sup>                                                  | -                                                                        | -                        |
| <i>Euphorbia valerianifolia</i>            | w/w  | Batash <sup>13</sup>                                                   | Ashkelon <sup>2</sup>                                                    | -                        |
| <i>Euphorbia</i> sp.                       |      | -                                                                      | Aphek <sup>1, 5</sup><br>Ashkelon <sup>2, 5</sup>                        | -                        |

|                                                                                   |      |                                                                                                                                                                                                                             |                                                                                                                                 |                                                                                                                                                            |
|-----------------------------------------------------------------------------------|------|-----------------------------------------------------------------------------------------------------------------------------------------------------------------------------------------------------------------------------|---------------------------------------------------------------------------------------------------------------------------------|------------------------------------------------------------------------------------------------------------------------------------------------------------|
| <i>Ficus carica</i>                                                               | cult | Aphek <sup>1,2</sup><br>Batash <sup>13</sup><br>Beth Shean <sup>14</sup><br>Ekron <sup>2</sup><br>Ifshar <sup>29</sup><br>Jericho <sup>18</sup><br>Megiddo <sup>8</sup><br>Safi/Gath <sup>2,4</sup><br>Shiloh <sup>20</sup> | Aphek <sup>1,2</sup><br>Ashkelon <sup>2,10,11,5</sup><br>Ekron <sup>2</sup><br>Qasile <sup>28</sup><br>Safi/Gath <sup>2,4</sup> | Aphek <sup>1,2</sup><br>Megiddo <sup>8</sup><br>Rosh Zayit <sup>19</sup><br>Shiloh <sup>20</sup>                                                           |
| <i>Ficus sycomorus</i>                                                            | cult | -                                                                                                                                                                                                                           | Ashkelon <sup>10,11,5</sup>                                                                                                     | -                                                                                                                                                          |
| <i>Fumaria parviflora</i>                                                         | w/w  | -                                                                                                                                                                                                                           | Ashkelon <sup>5</sup>                                                                                                           | Beth Shean <sup>7</sup>                                                                                                                                    |
| <i>Fumaria</i> (Sect. <i>Fumaria</i> )                                            |      | Aphek <sup>1,2</sup><br>Jericho <sup>18</sup>                                                                                                                                                                               | Aphek <sup>1,2</sup><br>Ashkelon <sup>2</sup>                                                                                   | Aphek <sup>1,2</sup>                                                                                                                                       |
| <i>Galium aparine</i>                                                             | w/w  | -                                                                                                                                                                                                                           | Ashkelon <sup>2,5</sup>                                                                                                         | -                                                                                                                                                          |
| <i>Galium tricoratum</i>                                                          | w/w  | Beth Shean <sup>14</sup><br>Manahat <sup>3</sup><br>Shiloh <sup>20</sup>                                                                                                                                                    | Ashkelon <sup>5</sup>                                                                                                           | Afula <sup>24</sup><br>Beth Shean <sup>7</sup><br>Rosh Zayit <sup>19</sup><br>Shiloh <sup>20</sup>                                                         |
| <i>Galium</i> sp.                                                                 |      | Aphek <sup>2</sup><br>Batash <sup>13</sup><br>Ekron <sup>2</sup><br>Ifshar <sup>15,29,16</sup><br>Jericho <sup>18</sup>                                                                                                     | Aphek <sup>1,2</sup><br>Ashkelon <sup>2</sup><br>Ekron <sup>2</sup>                                                             | Aphek <sup>1,2</sup><br>Ifshar <sup>15</sup>                                                                                                               |
| <i>Gastridium ventricosum</i>                                                     | w/w  | -                                                                                                                                                                                                                           | Ekron <sup>2</sup>                                                                                                              | -                                                                                                                                                          |
| <i>Geranium</i> sp.                                                               |      | Ekron <sup>2</sup>                                                                                                                                                                                                          | -                                                                                                                               | -                                                                                                                                                          |
| <i>Geropogon hybridus</i>                                                         | w/w  | Batash <sup>13</sup>                                                                                                                                                                                                        | -                                                                                                                               | -                                                                                                                                                          |
| <i>Glaucium corniculatum</i>                                                      | w/w  | -                                                                                                                                                                                                                           | Ashkelon <sup>2</sup>                                                                                                           | -                                                                                                                                                          |
| <i>Gynandris sisyrrinchium</i>                                                    | w/w  | -                                                                                                                                                                                                                           | Aphek <sup>1,2</sup><br>Ashkelon <sup>5</sup>                                                                                   | Beth Shean <sup>7</sup>                                                                                                                                    |
| <i>Gypsophyla</i> sp.                                                             |      | Megiddo <sup>8</sup>                                                                                                                                                                                                        | -                                                                                                                               | Megiddo <sup>8</sup>                                                                                                                                       |
| <i>Helianthemum stipulatum</i>                                                    | w/w  | -                                                                                                                                                                                                                           | Ashkelon <sup>10,11,5</sup>                                                                                                     | -                                                                                                                                                          |
| <i>Heliotropium europaeum</i>                                                     | w/w  | -                                                                                                                                                                                                                           | Aphek <sup>1,2</sup><br>Safi/Gath <sup>2,4</sup>                                                                                | -                                                                                                                                                          |
| <i>Heliotropium</i> sp.                                                           |      | Aphek <sup>1,2</sup>                                                                                                                                                                                                        | Ashkelon <sup>2</sup><br>Ekron <sup>2</sup>                                                                                     | Shiloh <sup>20</sup>                                                                                                                                       |
| <i>Hippocrepis areolata/unisiliquosa</i>                                          | w/w  | -                                                                                                                                                                                                                           | Ashkelon <sup>5</sup>                                                                                                           | -                                                                                                                                                          |
| <i>Hippocrepis unisiliquosa</i>                                                   | w/w  | -                                                                                                                                                                                                                           | Aphek <sup>1,2</sup>                                                                                                            | -                                                                                                                                                          |
| <i>Hippocrepis</i> sp.                                                            |      | -                                                                                                                                                                                                                           | -                                                                                                                               | Shiloh <sup>20</sup>                                                                                                                                       |
| <i>Hordeum bulbosum</i>                                                           | w/w  | Aphek <sup>1,2</sup>                                                                                                                                                                                                        | -                                                                                                                               | -                                                                                                                                                          |
| <i>Hordeum distichon</i>                                                          | cult | Arad <sup>21</sup><br>Ifshar <sup>15,16</sup><br>Jericho <sup>18</sup><br>Manahat <sup>3</sup><br>Shiloh <sup>20</sup>                                                                                                      | Aphek <sup>1,2</sup><br>Ashkelon <sup>10,11</sup><br>Qasile <sup>28</sup>                                                       | Beth Shean <sup>7,25</sup><br>Ifshar <sup>15</sup><br>Rosh Zayit <sup>19</sup><br>Shiloh <sup>20</sup>                                                     |
| <i>Hordeum hexastichium</i>                                                       | cult | -                                                                                                                                                                                                                           | -                                                                                                                               | Beth Shean <sup>7</sup>                                                                                                                                    |
| <i>Hordeum glaucum</i>                                                            | w/w  | Aphek <sup>1,2</sup>                                                                                                                                                                                                        | Ashkelon <sup>2,5</sup><br>Ekron <sup>2</sup><br>Safi/Gath <sup>2,4</sup>                                                       | Aphek <sup>1,2</sup><br>Beth Shean <sup>7</sup>                                                                                                            |
| <i>Hordeum marinum</i>                                                            | w/w  | -                                                                                                                                                                                                                           | Ashkelon <sup>2,5</sup>                                                                                                         | -                                                                                                                                                          |
| <i>Hordeum vulgare</i> s.l. ( <i>Hordeum sativum</i> and <i>Hordeum vulgare</i> ) | cult | Afula <sup>17</sup><br>Aphek <sup>1,2</sup><br>Arad <sup>21</sup><br>Batash <sup>13</sup><br>Beth Shean <sup>14</sup><br>Ekron <sup>2</sup>                                                                                 | Aphek <sup>1,2</sup><br>Ashkelon <sup>2,5</sup><br>Ekron <sup>2</sup><br>Qasile <sup>28</sup><br>Safi/Gath <sup>2,4</sup>       | Aphek <sup>1,2</sup><br>Beth Shean <sup>25</sup><br>Keisan <sup>23</sup><br>Megiddo <sup>8</sup><br>Ramat Matred <sup>31</sup><br>Rosh Zayit <sup>19</sup> |

|                                          |      |                                                                                                                                                                                                                                                                                                          |                                                                                                                                      |                                                                                                                                      |
|------------------------------------------|------|----------------------------------------------------------------------------------------------------------------------------------------------------------------------------------------------------------------------------------------------------------------------------------------------------------|--------------------------------------------------------------------------------------------------------------------------------------|--------------------------------------------------------------------------------------------------------------------------------------|
|                                          |      | Ifshar <sup>15, 29, 16</sup><br>Jericho <sup>18</sup><br>Lachish <sup>26</sup><br>Megiddo <sup>8</sup><br>Safi/Gath <sup>2, 4</sup><br>Shiqmim <sup>6</sup>                                                                                                                                              |                                                                                                                                      | Shiloh <sup>20</sup>                                                                                                                 |
| <i>Hordeum spontaneum</i>                | w/w  | -                                                                                                                                                                                                                                                                                                        | Ashkelon <sup>2, 5</sup>                                                                                                             | Rosh Zayit <sup>19</sup>                                                                                                             |
| <i>Hordeum</i> sp.                       | w/w  | Afula <sup>17</sup><br>Ashdod <sup>32</sup><br>Ifshar <sup>15</sup><br>Jericho <sup>18</sup><br>Ta'anach <sup>9</sup>                                                                                                                                                                                    | Ekron <sup>2</sup>                                                                                                                   | Arad <sup>27</sup><br>Be'er Sheba <sup>27</sup><br>City of David <sup>12</sup><br>Megiddo <sup>8</sup><br>Ramat Matred <sup>31</sup> |
| <i>Hymenocarpus circinnatus</i>          | w/w  | Aphek <sup>1, 2</sup>                                                                                                                                                                                                                                                                                    | Aphek <sup>1, 2</sup><br>Ashkelon <sup>5</sup><br>Ekron <sup>2</sup>                                                                 | -                                                                                                                                    |
| <i>Hyoscyamus albus</i>                  | w/w  | -                                                                                                                                                                                                                                                                                                        | Ashkelon <sup>2</sup>                                                                                                                | -                                                                                                                                    |
| <i>Hyoscyamus aureus</i>                 | w/w  | -                                                                                                                                                                                                                                                                                                        | Ashkelon <sup>2</sup>                                                                                                                | -                                                                                                                                    |
| <i>Hypericum triquetrifolium</i>         | w/w  | -                                                                                                                                                                                                                                                                                                        | -                                                                                                                                    | Rosh Zayit <sup>19</sup>                                                                                                             |
| <i>Juglans regia</i>                     | cult | -                                                                                                                                                                                                                                                                                                        | -                                                                                                                                    | City of David <sup>12</sup>                                                                                                          |
| <i>Juncus acutus</i>                     | w/w  | -                                                                                                                                                                                                                                                                                                        | Ashkelon <sup>10, 11, 5</sup>                                                                                                        | -                                                                                                                                    |
| <i>Kickxia spuria</i>                    | w/w  | -                                                                                                                                                                                                                                                                                                        | Ashkelon <sup>2</sup>                                                                                                                | -                                                                                                                                    |
| <i>Knautia integrifolia</i>              | w/w  | Megiddo <sup>8</sup>                                                                                                                                                                                                                                                                                     | -                                                                                                                                    | Megiddo <sup>8</sup>                                                                                                                 |
| <i>Lathyrus clymenum</i>                 | w/w  | Nami <sup>33, 34</sup>                                                                                                                                                                                                                                                                                   | -                                                                                                                                    | -                                                                                                                                    |
| <i>Lathyrus hierosolymitanus</i>         | w/w  | -                                                                                                                                                                                                                                                                                                        | Aphek <sup>1, 2</sup><br>Ekron <sup>2</sup>                                                                                          | -                                                                                                                                    |
| <i>Lathyrus marmoratus</i>               | w/w  | -                                                                                                                                                                                                                                                                                                        | Ekron <sup>2</sup>                                                                                                                   | -                                                                                                                                    |
| <i>Lathyrus sativus</i>                  | cult | Ekron <sup>2</sup><br>Lachish <sup>26</sup>                                                                                                                                                                                                                                                              | Ashkelon <sup>2, 5</sup>                                                                                                             | -                                                                                                                                    |
| <i>Lathyrus sativus/cicera</i>           | cult | Batash <sup>13</sup>                                                                                                                                                                                                                                                                                     | Ashkelon <sup>34</sup><br>Ekron <sup>34</sup><br>Qasile <sup>28, 34</sup>                                                            | -                                                                                                                                    |
| <i>Lathyrus</i> (Sect. <i>Cicerula</i> ) | cult | Ashdod <sup>32</sup><br>Batash <sup>13</sup><br>Ekron <sup>2</sup>                                                                                                                                                                                                                                       | Aphek <sup>1, 2</sup><br>Ashkelon <sup>2, 5</sup><br>Ekron <sup>2</sup>                                                              | Aphek <sup>1, 2</sup><br>Shiloh <sup>20</sup>                                                                                        |
| <i>Lathyrus</i> sp.                      |      | Ekron <sup>2</sup><br>Jericho <sup>18</sup><br>Shiloh <sup>20</sup>                                                                                                                                                                                                                                      | Ashkelon <sup>2, 10, 11, 5</sup>                                                                                                     | Rosh Zayit <sup>19</sup>                                                                                                             |
| <i>Laurus nobilis</i>                    | w/w  | -                                                                                                                                                                                                                                                                                                        | Ashkelon <sup>10, 11, 5</sup>                                                                                                        | -                                                                                                                                    |
| <i>Lavatera trimestris</i>               | w/w  | Batash <sup>13</sup>                                                                                                                                                                                                                                                                                     | -                                                                                                                                    | -                                                                                                                                    |
| <i>Lens culinaris</i>                    | cult | Aphek <sup>1, 2</sup><br>Arad <sup>21</sup><br>Batash <sup>13</sup><br>Beth Shean <sup>14</sup><br>Ekron <sup>2</sup><br>Ifshar <sup>15, 16</sup><br>Jericho <sup>18</sup><br>Lachish <sup>26</sup><br>Manahat <sup>3</sup><br>Megiddo <sup>8</sup><br>Shiloh <sup>20</sup><br>Safi/Gath <sup>2, 4</sup> | Aphek <sup>1, 2, 11</sup><br>Ashkelon <sup>2, 10, 5</sup><br>Ekron <sup>2</sup><br>Qasile <sup>28</sup><br>Safi/Gath <sup>2, 4</sup> | Aphek <sup>1, 2</sup><br>Beth Shean <sup>7</sup><br>Ifshar <sup>15</sup><br>Megiddo <sup>8</sup><br>Shiloh <sup>20</sup>             |
| <i>Lens</i> sp.                          |      | Aphek <sup>1, 2</sup><br>Ifshar <sup>29</sup><br>Jericho <sup>18</sup><br>Ta'anach <sup>9</sup>                                                                                                                                                                                                          | Ekron <sup>2</sup>                                                                                                                   | Aphek <sup>2</sup><br>City of David <sup>12</sup>                                                                                    |



|                                  |      |                                                                                                                                                                                                                                   |                                                                                                                                 |                                                                                                                                                                                                         |
|----------------------------------|------|-----------------------------------------------------------------------------------------------------------------------------------------------------------------------------------------------------------------------------------|---------------------------------------------------------------------------------------------------------------------------------|---------------------------------------------------------------------------------------------------------------------------------------------------------------------------------------------------------|
| <i>Leopoldia comosa</i>          | w/w  | -                                                                                                                                                                                                                                 | -                                                                                                                               | Aphek <sup>1,2</sup>                                                                                                                                                                                    |
| <i>Linaria chalepensis</i>       | w/w  | -                                                                                                                                                                                                                                 | Ashkelon <sup>10,11,5</sup>                                                                                                     | -                                                                                                                                                                                                       |
| <i>Linum bienne</i>              | w/w  | -                                                                                                                                                                                                                                 | Ashkelon <sup>2,5</sup>                                                                                                         | -                                                                                                                                                                                                       |
| <i>Linum bienne/nodiflorum</i>   | w/w  | -                                                                                                                                                                                                                                 | -                                                                                                                               | Beth Shean <sup>25</sup>                                                                                                                                                                                |
| <i>Linum bienne/strictum</i>     | w/w  | -                                                                                                                                                                                                                                 | Ekron <sup>2</sup>                                                                                                              | -                                                                                                                                                                                                       |
| <i>Linum nodiflorum</i>          | w/w  | Batash <sup>13</sup>                                                                                                                                                                                                              | -                                                                                                                               | Rosh Zayit <sup>19</sup>                                                                                                                                                                                |
| <i>Linum pubescens</i>           | w/w  | Batash <sup>13</sup>                                                                                                                                                                                                              | -                                                                                                                               | -                                                                                                                                                                                                       |
| <i>Linum usitatissimum</i>       | cult | Aphek <sup>1,2</sup><br>Arad <sup>21</sup><br>Beth Shean <sup>14</sup><br>Jericho <sup>18</sup>                                                                                                                                   | Aphek <sup>1,2</sup><br>Ashkelon <sup>2,5</sup><br>Ekron <sup>2</sup><br>Qasile <sup>28</sup>                                   | Aphek <sup>1,2</sup><br>Beth Shean <sup>25</sup><br>Shiloh <sup>20</sup>                                                                                                                                |
| <i>Linum</i> sp.                 |      | Aphek <sup>2</sup><br>Beth Shean <sup>14</sup><br>Ekron <sup>2</sup><br>Ifshar <sup>15,29,16</sup><br>Jericho <sup>18</sup>                                                                                                       | Aphek <sup>1,2</sup><br>Ashkelon <sup>2,5</sup><br>Ekron <sup>2</sup>                                                           | Aphek <sup>1,2</sup><br>Ifshar <sup>15</sup>                                                                                                                                                            |
| <i>Lolium rigidum</i>            | w/w  | Beth Shean <sup>14</sup>                                                                                                                                                                                                          | Ashkelon <sup>2,5</sup>                                                                                                         | Rosh Zayit <sup>19</sup>                                                                                                                                                                                |
| <i>Lolium temulentum</i>         | w/w  | Aphek <sup>1,2</sup><br>Batash <sup>13</sup><br>Beth Shean <sup>14</sup><br>Ekron <sup>2</sup><br>Ifshar <sup>15,29,16</sup><br>Lachish <sup>26</sup><br>Megiddo <sup>8</sup><br>Shiloh <sup>20</sup><br>Safi/Gath <sup>2,4</sup> | Aphek <sup>1,2</sup><br>Ashkelon <sup>2,10,11,5</sup><br>Ekron <sup>2</sup><br>Qasile <sup>28</sup><br>Safi/Gath <sup>2,4</sup> | Aphek <sup>1,2</sup><br>Beth Shean <sup>7,25</sup><br>Ifshar <sup>15</sup><br>Keisan <sup>23</sup><br>Lachish <sup>26</sup><br>Megiddo <sup>8</sup><br>Rosh Zayit <sup>19</sup><br>Shiloh <sup>20</sup> |
| <i>Lolium temulentum/rigidum</i> | w/w  | -                                                                                                                                                                                                                                 | -                                                                                                                               | Beth Shean <sup>7</sup>                                                                                                                                                                                 |
| <i>Lolium</i> sp.                |      | Arad <sup>21</sup><br>Beth Shean <sup>14</sup><br>Jericho <sup>18</sup><br>Manahat <sup>3</sup><br>Megiddo <sup>8</sup>                                                                                                           | -                                                                                                                               | Megiddo <sup>8</sup>                                                                                                                                                                                    |
| <i>Lupinus</i> sp.               |      | -                                                                                                                                                                                                                                 | -                                                                                                                               | Rosh Zayit <sup>19</sup>                                                                                                                                                                                |
| <i>Lycium schweinfurthii</i>     | w/w  | -                                                                                                                                                                                                                                 | Aphek <sup>1,2</sup>                                                                                                            | -                                                                                                                                                                                                       |
| <i>Lysimachia dubia</i>          | w/w  | -                                                                                                                                                                                                                                 | Ashkelon <sup>10,11,5</sup>                                                                                                     | -                                                                                                                                                                                                       |
| <i>Malva nicaeensis</i>          | w/w  | -                                                                                                                                                                                                                                 | Ashkelon <sup>2</sup>                                                                                                           | -                                                                                                                                                                                                       |
| <i>Malva oxyloba/parviflora</i>  | w/w  | -                                                                                                                                                                                                                                 | Ashkelon <sup>5</sup>                                                                                                           | -                                                                                                                                                                                                       |
| <i>Malva parviflora</i>          | w/w  | Aphek <sup>1,2</sup><br>Beth Shean <sup>14</sup><br>Shiloh <sup>20</sup><br>Shiqmim <sup>6</sup>                                                                                                                                  | Aphek <sup>1,2</sup><br>Ashkelon <sup>2,5</sup><br>Safi/Gath <sup>2,4</sup>                                                     | -                                                                                                                                                                                                       |
| <i>Malva</i> sp.                 |      | Aphek <sup>1,2</sup><br>Arad <sup>21</sup><br>Beth Shean <sup>14</sup><br>Ekron <sup>2</sup><br>Ifshar <sup>15,29,16</sup><br>Jericho <sup>18</sup><br>Safi/Gath <sup>2,4</sup>                                                   | Aphek <sup>1,2</sup><br>Ashkelon <sup>2,5</sup><br>Ekron <sup>2</sup><br>Safi/Gath <sup>2,4</sup>                               | Aphek <sup>1,2</sup>                                                                                                                                                                                    |
| <i>Medicago doliata</i>          | w/w  | Ekron <sup>2</sup>                                                                                                                                                                                                                | -                                                                                                                               | -                                                                                                                                                                                                       |
| <i>Medicago littoralis</i>       | w/w  | -                                                                                                                                                                                                                                 | Aphek <sup>1,2</sup>                                                                                                            | -                                                                                                                                                                                                       |
| <i>Medicago minima</i>           | w/w  | Beth Shean <sup>14</sup><br>Megiddo <sup>8</sup>                                                                                                                                                                                  | -                                                                                                                               | Megiddo <sup>8</sup>                                                                                                                                                                                    |
| <i>Medicago orbicularis</i>      | w/w  | Ta'anach <sup>9</sup>                                                                                                                                                                                                             | -                                                                                                                               | -                                                                                                                                                                                                       |
| <i>Medicago polymorpha</i>       | w/w  | -                                                                                                                                                                                                                                 | Aphek <sup>1,2</sup>                                                                                                            | -                                                                                                                                                                                                       |

|                                        |      |                                                                                                                                                                                                                                                                                                       |                                                                                                                                 |                                                                                                                                                                                                                                                                                                            |
|----------------------------------------|------|-------------------------------------------------------------------------------------------------------------------------------------------------------------------------------------------------------------------------------------------------------------------------------------------------------|---------------------------------------------------------------------------------------------------------------------------------|------------------------------------------------------------------------------------------------------------------------------------------------------------------------------------------------------------------------------------------------------------------------------------------------------------|
| <i>Medicago polymorpha/minima</i>      |      | -                                                                                                                                                                                                                                                                                                     | Aphek <sup>1,2</sup>                                                                                                            | -                                                                                                                                                                                                                                                                                                          |
| <i>Medicago scutellata</i>             | w/w  | Ta'anach <sup>9</sup>                                                                                                                                                                                                                                                                                 | -                                                                                                                               | -                                                                                                                                                                                                                                                                                                          |
| <i>Medicago tuberculata</i>            | w/w  | -                                                                                                                                                                                                                                                                                                     | Ashkelon <sup>5</sup>                                                                                                           | Beth Shean <sup>7</sup>                                                                                                                                                                                                                                                                                    |
| <i>Medicago</i> sp.                    |      | Aphek <sup>1,2</sup><br>Batash <sup>13</sup><br>Ekron <sup>2</sup><br>Ifshar <sup>15,16,29</sup><br>Safi/Gath <sup>2,4</sup>                                                                                                                                                                          | Aphek <sup>1,2</sup><br>Ashkelon <sup>2,5</sup><br>Ekron <sup>2</sup><br>Safi/Gath <sup>2,4</sup>                               | Aphek <sup>1,2</sup>                                                                                                                                                                                                                                                                                       |
| <i>Melilotus</i> sp.                   |      | Megiddo <sup>8</sup>                                                                                                                                                                                                                                                                                  | -                                                                                                                               | Megiddo <sup>8</sup>                                                                                                                                                                                                                                                                                       |
| <i>Mercurialis annua</i>               | w/w  | Aphek <sup>1,2</sup>                                                                                                                                                                                                                                                                                  | Aphek <sup>1,2</sup><br>Ekron <sup>2</sup>                                                                                      | Aphek <sup>2</sup>                                                                                                                                                                                                                                                                                         |
| <i>Mesembryanthemum</i> sp.            | w/w  | -                                                                                                                                                                                                                                                                                                     | Ashkelon <sup>5</sup>                                                                                                           | -                                                                                                                                                                                                                                                                                                          |
| <i>Moltkiopsis ciliata</i>             | w/w  | -                                                                                                                                                                                                                                                                                                     | Ashkelon <sup>2</sup>                                                                                                           | -                                                                                                                                                                                                                                                                                                          |
| <i>Neslia apiculata</i>                | w/w  | -                                                                                                                                                                                                                                                                                                     | -                                                                                                                               | Rosh Zayit <sup>19</sup><br>Shiloh <sup>20</sup>                                                                                                                                                                                                                                                           |
| <i>Ochthodium aegyptiacum</i>          | w/w  | Aphek <sup>1,2</sup><br>Ekron <sup>2</sup>                                                                                                                                                                                                                                                            | Ashkelon <sup>2,5</sup>                                                                                                         | Aphek <sup>2</sup><br>Shiloh <sup>20</sup>                                                                                                                                                                                                                                                                 |
| <i>Olea europaea</i>                   | cult | Aphek <sup>1,2</sup><br>Arad <sup>21</sup><br>Batash <sup>13</sup><br>Beth Shean <sup>14</sup><br>Ekron <sup>2</sup><br>Lachish <sup>26</sup><br>Manahat <sup>3</sup><br>Megiddo <sup>8</sup><br>Safi/Gath <sup>2,4</sup><br>Shiloh <sup>20</sup><br>Ta'anach <sup>9</sup><br>Tel Dalit <sup>35</sup> | Aphek <sup>1,2</sup><br>Ashkelon <sup>2,10,11,5</sup><br>Batash <sup>13</sup><br>Ekron <sup>2</sup><br>Safi/Gath <sup>2,4</sup> | Afula <sup>24</sup><br>Aphek <sup>1,2</sup><br>Arad <sup>27</sup><br>Batash <sup>13</sup><br>Be'er Sheba <sup>27</sup><br>Beth Shean <sup>7</sup><br>City of David <sup>12</sup><br>Kedesh <sup>36</sup><br>Lachish <sup>26</sup><br>Megiddo <sup>8</sup><br>Shiloh <sup>20</sup><br>Ta'anach <sup>9</sup> |
| <i>Onobrychis caput-galli</i>          | w/w  | Shiloh <sup>20</sup>                                                                                                                                                                                                                                                                                  | Ashkelon <sup>5</sup>                                                                                                           | -                                                                                                                                                                                                                                                                                                          |
| <i>Onobrychis</i> sp.                  |      | -                                                                                                                                                                                                                                                                                                     | Ashkelon <sup>2</sup>                                                                                                           | -                                                                                                                                                                                                                                                                                                          |
| <i>Ononis ornithopodioides/viscosa</i> | w/w  | Shiloh <sup>20</sup>                                                                                                                                                                                                                                                                                  | -                                                                                                                               | -                                                                                                                                                                                                                                                                                                          |
| <i>Ononis serrata</i>                  | w/w  | Beth Shean <sup>14</sup>                                                                                                                                                                                                                                                                              | -                                                                                                                               | -                                                                                                                                                                                                                                                                                                          |
| <i>Ononis viscosa ssp. sicula</i>      | w/w  | -                                                                                                                                                                                                                                                                                                     | Aphek <sup>1,2</sup>                                                                                                            | -                                                                                                                                                                                                                                                                                                          |
| <i>Ononis</i> sp.                      |      | Aphek <sup>1,2</sup><br>Ifshar <sup>15,16</sup>                                                                                                                                                                                                                                                       | Aphek <sup>1,2</sup>                                                                                                            | -                                                                                                                                                                                                                                                                                                          |
| <i>Onopordum</i> sp.                   | w/w  | -                                                                                                                                                                                                                                                                                                     | Ashkelon <sup>5</sup>                                                                                                           | -                                                                                                                                                                                                                                                                                                          |
| <i>Onosma gigantea</i>                 | w/w  | -                                                                                                                                                                                                                                                                                                     | Aphek <sup>1,2</sup><br>Ashkelon <sup>2</sup><br>Ekron <sup>2</sup>                                                             | -                                                                                                                                                                                                                                                                                                          |
| <i>Oryzopsis miliacea</i>              | w/w  | -                                                                                                                                                                                                                                                                                                     | -                                                                                                                               | Shiloh <sup>20</sup>                                                                                                                                                                                                                                                                                       |
| <i>Panicum</i> sp.                     |      | -                                                                                                                                                                                                                                                                                                     | Ekron <sup>2</sup>                                                                                                              | -                                                                                                                                                                                                                                                                                                          |
| <i>Papaver somniferum</i>              | cult | -                                                                                                                                                                                                                                                                                                     | Ashkelon <sup>2</sup>                                                                                                           | -                                                                                                                                                                                                                                                                                                          |
| <i>Papaver</i> sp.                     | w/w  | Jericho <sup>18</sup>                                                                                                                                                                                                                                                                                 | -                                                                                                                               | -                                                                                                                                                                                                                                                                                                          |
| <i>Paronychia</i> sp.                  |      | Beth Shean <sup>14</sup>                                                                                                                                                                                                                                                                              | -                                                                                                                               | -                                                                                                                                                                                                                                                                                                          |
| <i>Phalaris paradoxa</i>               | w/w  | Aphek <sup>1</sup><br>Batash <sup>13</sup><br>Beth Shean <sup>14</sup><br>Ekron <sup>2</sup><br>Ifshar <sup>15,29,16</sup><br>Megiddo <sup>8</sup><br>Shiloh <sup>20</sup>                                                                                                                            | Aphek <sup>1,2</sup><br>Ashkelon <sup>10,11,5</sup>                                                                             | Ifshar <sup>15</sup><br>Keisan <sup>23</sup><br>Megiddo <sup>8</sup><br>Rosh Zayit <sup>19</sup><br>Shiloh <sup>20</sup>                                                                                                                                                                                   |
| <i>Phalaris paradoxa/minor</i>         | w/w  | Afula <sup>17</sup><br>Beth Shean <sup>14</sup>                                                                                                                                                                                                                                                       | -                                                                                                                               | Beth Shean <sup>7</sup>                                                                                                                                                                                                                                                                                    |

|                                               |      |                                                                                                                                                  |                                                                                                      |                                                                                                              |
|-----------------------------------------------|------|--------------------------------------------------------------------------------------------------------------------------------------------------|------------------------------------------------------------------------------------------------------|--------------------------------------------------------------------------------------------------------------|
| <i>Phalaris</i> sp.                           |      | Aphek <sup>1,2</sup><br>Ekron <sup>2</sup><br>Safi/Gath <sup>2,4</sup>                                                                           | Aphek <sup>1,2</sup><br>Ashkelon <sup>2</sup><br>Ekron <sup>2</sup><br>Safi/Gath <sup>2,4</sup>      | Aphek <sup>1,2</sup>                                                                                         |
| <i>Phleum exaratum/subulatum</i>              | w/w  | -                                                                                                                                                | Safi/Gath <sup>2</sup>                                                                               | -                                                                                                            |
| <i>Phleum subulatum</i> and <i>Phleum</i> sp. | w/w  | -                                                                                                                                                | Aphek <sup>1,2</sup><br>Ashkelon <sup>2,5</sup>                                                      | -                                                                                                            |
| <i>Phoenix dactylifera</i>                    | cult | Jericho <sup>18</sup>                                                                                                                            | -                                                                                                    | Arad <sup>27</sup><br>Be'er Sheba <sup>27</sup><br>City of David <sup>12</sup><br>Ramat Matred <sup>31</sup> |
| <i>Picris altissima</i>                       | w/w  | Batash <sup>13</sup><br>Beth Shean <sup>14</sup>                                                                                                 | -                                                                                                    | Rosh Zayit <sup>19</sup>                                                                                     |
| <i>Picris amalecitana</i>                     | w/w  | -                                                                                                                                                | Ashkelon <sup>2</sup>                                                                                | -                                                                                                            |
| <i>Picris galilaea</i>                        | w/w  | Batash <sup>13</sup>                                                                                                                             | Ashkelon <sup>2, 10, 11, 5</sup>                                                                     | -                                                                                                            |
| <i>Piptatherum holciforme</i>                 | w/w  | -                                                                                                                                                | Ashkelon <sup>2,5</sup>                                                                              | -                                                                                                            |
| <i>Piptatherum</i> sp.                        |      | -                                                                                                                                                | Aphek <sup>1,2</sup>                                                                                 | -                                                                                                            |
| <i>Pistacia atlantica</i>                     | w/w  | Arad <sup>21</sup><br>Batash <sup>13</sup><br>Beth Shean <sup>14</sup><br>Jericho <sup>18</sup><br>Lachish <sup>26</sup><br>Manahat <sup>3</sup> | Aphek <sup>1,2</sup><br>Ekron <sup>2</sup>                                                           | -                                                                                                            |
| <i>Pistacia atlantica/palaestina</i>          | w/w  | -                                                                                                                                                | Ekron <sup>2</sup>                                                                                   | -                                                                                                            |
| <i>Pistacia palaestina</i>                    | w/w  | Ekron <sup>2</sup><br>Manahat <sup>3</sup><br>Shiloh <sup>20</sup>                                                                               | -                                                                                                    | Shiloh <sup>20</sup>                                                                                         |
| <i>Pisum elatius</i>                          | w/w  | -                                                                                                                                                | Aphek <sup>1,2</sup>                                                                                 | -                                                                                                            |
| <i>Pisum fulvum</i>                           | w/w  | -                                                                                                                                                | Safi/Gath <sup>2,4</sup>                                                                             | -                                                                                                            |
| <i>Pisum sativum</i>                          | cult | Arad <sup>21</sup><br>Jericho <sup>18</sup>                                                                                                      | -                                                                                                    | -                                                                                                            |
| <i>Pisum</i> sp.                              |      | Ta'anach <sup>9</sup>                                                                                                                            | -                                                                                                    | -                                                                                                            |
| <i>Plantago lagopus</i>                       | w/w  | -                                                                                                                                                | Ashkelon <sup>2</sup>                                                                                | -                                                                                                            |
| <i>Plantago notata</i>                        | w/w  | -                                                                                                                                                | Ashkelon <sup>5</sup>                                                                                | -                                                                                                            |
| <i>Plantago ovata</i>                         | w/w  | -                                                                                                                                                | Ekron <sup>2</sup>                                                                                   | -                                                                                                            |
| <i>Plantago</i> sp.                           |      | Aphek <sup>1,2</sup><br>Ekron <sup>2</sup><br>Jericho <sup>18</sup><br>Shiqmim <sup>6</sup>                                                      | Ashkelon <sup>2,5</sup>                                                                              | Aphek <sup>2</sup>                                                                                           |
| <i>Poa bulbosa</i>                            | w/w  | -                                                                                                                                                | Ashkelon <sup>5</sup>                                                                                | -                                                                                                            |
| <i>Poa</i> sp.                                |      | -                                                                                                                                                | Ashkelon <sup>2,5</sup>                                                                              | -                                                                                                            |
| <i>Polygonum arenastrum</i>                   | w/w  | Aphek <sup>1,2</sup>                                                                                                                             | Ashkelon <sup>5</sup>                                                                                | -                                                                                                            |
| <i>Polygonum</i> sp.                          |      | Megiddo <sup>8</sup>                                                                                                                             | -                                                                                                    | Megiddo <sup>8</sup>                                                                                         |
| <i>Portulaca oleracea</i>                     | w/w  | -                                                                                                                                                | Ashkelon <sup>2,5</sup>                                                                              | -                                                                                                            |
| <i>Prosopis farcta</i>                        | w/w  | Beth Shean <sup>14</sup>                                                                                                                         | -                                                                                                    | -                                                                                                            |
| <i>Prunus armeniaca</i>                       | cult | -                                                                                                                                                | -                                                                                                    | City of David <sup>12</sup>                                                                                  |
| <i>Prunus persica</i>                         | cult | -                                                                                                                                                | -                                                                                                    | City of David <sup>12</sup>                                                                                  |
| <i>Prunus</i> sp.                             |      | -                                                                                                                                                | Qasile <sup>28</sup>                                                                                 | -                                                                                                            |
| <i>Punica granatum</i>                        | cult | Arad <sup>21</sup><br>Batash <sup>13</sup><br>Beth Shean <sup>14</sup><br>Ekron <sup>2</sup><br>Ifshar <sup>15</sup>                             | Ashkelon <sup>10, 11</sup><br>Aphek <sup>1,2</sup><br>Ekron <sup>2</sup><br>Safi/Gath <sup>2,4</sup> | City of David <sup>12</sup>                                                                                  |

|                                                      |     |                                                                                                                                                                                                       |                                                                                                                              |                                                                                                   |
|------------------------------------------------------|-----|-------------------------------------------------------------------------------------------------------------------------------------------------------------------------------------------------------|------------------------------------------------------------------------------------------------------------------------------|---------------------------------------------------------------------------------------------------|
|                                                      |     | Jericho <sup>18</sup><br>Shiloh <sup>20</sup>                                                                                                                                                         |                                                                                                                              |                                                                                                   |
| <i>Quercus</i> sp.                                   |     | Arad <sup>21</sup><br>Ifshar <sup>15, 16</sup><br>Manahat <sup>3</sup>                                                                                                                                | Ashkelon <sup>10, 11, 5</sup>                                                                                                | -                                                                                                 |
| <i>Ranunculus arvensis</i>                           | w/w | Aphek <sup>1, 2</sup>                                                                                                                                                                                 | Aphek <sup>1, 2, 5</sup>                                                                                                     | -                                                                                                 |
| <i>Ranunculus marginatus</i>                         | w/w | Batash <sup>13</sup>                                                                                                                                                                                  | -                                                                                                                            | -                                                                                                 |
| <i>Ranunculus marginatus</i> var. <i>scandicinus</i> | w/w | Aphek <sup>1, 2</sup><br>Ekron <sup>2</sup>                                                                                                                                                           | -                                                                                                                            | Aphek <sup>1, 2</sup>                                                                             |
| <i>Raphanus raphanistrum</i>                         | w/w | -                                                                                                                                                                                                     | Ashkelon <sup>2, 5</sup>                                                                                                     | -                                                                                                 |
| <i>Rapistrum rugosum</i>                             | w/w | Aphek <sup>1, 2</sup><br>Ekron <sup>2</sup>                                                                                                                                                           | Aphek <sup>1, 2</sup><br>Ashkelon <sup>5</sup><br>Ekron <sup>2</sup><br>Safi/Gath <sup>2, 4</sup>                            | Shiloh <sup>20</sup>                                                                              |
| <i>Reboudia pinnata</i>                              | w/w | -                                                                                                                                                                                                     | Ashkelon <sup>2, 5</sup>                                                                                                     | -                                                                                                 |
| <i>Reseda orientalis</i>                             | w/w | -                                                                                                                                                                                                     | Ashkelon <sup>2</sup>                                                                                                        | -                                                                                                 |
| <i>Reseda</i> sp.                                    |     | Aphek <sup>1, 2</sup>                                                                                                                                                                                 | -                                                                                                                            | -                                                                                                 |
| <i>Retama raetam</i>                                 | w/w | -                                                                                                                                                                                                     | Ashkelon <sup>5</sup>                                                                                                        | -                                                                                                 |
| <i>Rhagadiolus stellatus</i>                         | w/w | Batash <sup>13</sup>                                                                                                                                                                                  | -                                                                                                                            | -                                                                                                 |
| <i>Ridolfia segetum</i>                              | w/w | -                                                                                                                                                                                                     | -                                                                                                                            | Rosh Zayit <sup>19</sup>                                                                          |
| <i>Rubus sanguineus</i>                              | w/w | Shiloh <sup>20</sup>                                                                                                                                                                                  | -                                                                                                                            | -                                                                                                 |
| <i>Rumex conglomeratus</i>                           | w/w | Beth Shean <sup>14</sup>                                                                                                                                                                              | -                                                                                                                            | -                                                                                                 |
| <i>Rumex pulcher</i>                                 | w/w | Aphek <sup>1, 2</sup><br>Batash <sup>13</sup><br>Ekron <sup>2</sup><br>Megiddo <sup>8</sup>                                                                                                           | Aphek <sup>1, 2</sup><br>Ashkelon <sup>2, 5</sup><br>Ekron <sup>2</sup>                                                      | Aphek <sup>1, 2</sup><br>Megiddo <sup>8</sup><br>Rosh Zayit <sup>19</sup><br>Shiloh <sup>20</sup> |
| <i>Salsola kali</i>                                  | w/w | -                                                                                                                                                                                                     | Ashkelon <sup>2</sup>                                                                                                        | -                                                                                                 |
| <i>Schoenus nigricans</i>                            | w/w | -                                                                                                                                                                                                     | Aphek <sup>1, 2</sup><br>Ashkelon <sup>2, 10, 11, 5</sup><br>Ekron <sup>2</sup><br>Safi/Gath <sup>2, 4</sup>                 | -                                                                                                 |
| <i>Scirpus holoschoenus</i>                          | w/w | Beth Shean <sup>14</sup>                                                                                                                                                                              | -                                                                                                                            | -                                                                                                 |
| <i>Scirpus lacustris</i>                             | w/w | -                                                                                                                                                                                                     | Aphek <sup>1, 2</sup>                                                                                                        | -                                                                                                 |
| <i>Scirpus litoralis</i>                             | w/w | Aphek <sup>1, 2</sup>                                                                                                                                                                                 | Aphek <sup>1, 2</sup><br>Ashkelon <sup>2</sup><br>Ekron <sup>2</sup>                                                         | -                                                                                                 |
| <i>Scirpus maritimus</i>                             | w/w | Aphek <sup>1, 2</sup><br>Beth Shean <sup>14</sup>                                                                                                                                                     | Aphek <sup>1, 2</sup>                                                                                                        | Aphek <sup>2</sup>                                                                                |
| <i>Scirpus maritimus/lacustris</i>                   | w/w | Aphek <sup>1, 2</sup>                                                                                                                                                                                 | Aphek <sup>1, 2</sup><br>Ashkelon <sup>2</sup><br>Ekron <sup>2</sup>                                                         | -                                                                                                 |
| <i>Scorpiurus muricatus</i>                          | w/w | Aphek <sup>1, 2</sup><br>Ashdod <sup>32</sup><br>Batash <sup>13</sup><br>Beth Shean <sup>14</sup><br>Ekron <sup>2</sup><br>Lachish <sup>26</sup><br>Safi/Gath <sup>2, 4</sup><br>Shiloh <sup>20</sup> | Aphek <sup>1, 2</sup><br>Ashkelon <sup>2, 5</sup><br>Ekron <sup>2</sup><br>Qasile <sup>28</sup><br>Safi/Gath <sup>2, 4</sup> | Aphek <sup>1, 2</sup><br>Beth Shean <sup>7</sup>                                                  |
| <i>Scorpiurus</i> sp.                                |     | Megiddo <sup>8</sup>                                                                                                                                                                                  | -                                                                                                                            | -                                                                                                 |
| <i>Securigera securidaca</i>                         | w/w | -                                                                                                                                                                                                     | Aphek <sup>1, 2</sup><br>Ashkelon <sup>2</sup>                                                                               | Rosh Zayit <sup>19</sup>                                                                          |
| <i>Sherardia arvensis</i>                            | w/w | -                                                                                                                                                                                                     | Ashkelon <sup>5</sup>                                                                                                        | -                                                                                                 |
| <i>Silene nocturna</i>                               | w/w | -                                                                                                                                                                                                     | Ashkelon <sup>5</sup>                                                                                                        | -                                                                                                 |

|                                                     |      |                                                                                                                             |                                                                                                      |                                                                                                     |
|-----------------------------------------------------|------|-----------------------------------------------------------------------------------------------------------------------------|------------------------------------------------------------------------------------------------------|-----------------------------------------------------------------------------------------------------|
| <i>Silene</i> sp.                                   |      | Ifshar <sup>15, 29, 16</sup>                                                                                                | Ashkelon <sup>2, 5</sup><br>Ekron <sup>2</sup>                                                       | Ifshar <sup>16</sup>                                                                                |
| <i>Silybum marianum</i>                             | w/w  | Ashdod <sup>32</sup>                                                                                                        | -                                                                                                    | -                                                                                                   |
| <i>Sinapis</i> sp.                                  | w/w  | Arad <sup>21</sup>                                                                                                          | -                                                                                                    | -                                                                                                   |
| <i>Sisylax arenaria</i>                             | w/w  | -                                                                                                                           | Ashkelon <sup>2, 5</sup>                                                                             | -                                                                                                   |
| <i>Solanum nigrum/villosum</i>                      | w/w  | Beth Shean <sup>14</sup>                                                                                                    | Ashkelon <sup>2</sup>                                                                                | -                                                                                                   |
| <i>Solanum villosum</i>                             | w/w  | Aphek <sup>1, 2</sup>                                                                                                       | -                                                                                                    | Aphek <sup>2</sup>                                                                                  |
| <i>Spergula arvensis</i>                            | w/w  | Aphek <sup>1, 2</sup>                                                                                                       | Ashkelon <sup>5</sup>                                                                                | -                                                                                                   |
| <i>Spergula fallax</i>                              | w/w  | -                                                                                                                           | Ashkelon <sup>2, 5</sup>                                                                             | -                                                                                                   |
| <i>Stipa arabica</i>                                | w/w  | Beth Shean <sup>14</sup>                                                                                                    | -                                                                                                    | -                                                                                                   |
| <i>Stipa bromoides</i>                              | w/w  | -                                                                                                                           | Ashkelon <sup>5</sup>                                                                                | -                                                                                                   |
| <i>Styrax officinalis</i>                           | w/w  | Manahat <sup>3</sup>                                                                                                        | -                                                                                                    | -                                                                                                   |
| <i>Suaeda</i> sp.                                   | w/w  | Beth Shean <sup>14</sup>                                                                                                    | -                                                                                                    | -                                                                                                   |
| <i>Tetragonolobus palaestinus</i>                   | w/w  | Ta'anach <sup>9</sup>                                                                                                       | -                                                                                                    | -                                                                                                   |
| <i>Teucrium capitatum</i>                           | w/w  | -                                                                                                                           | Ashkelon <sup>5</sup>                                                                                | -                                                                                                   |
| <i>Thesium humile</i>                               | w/w  | -                                                                                                                           | Ashkelon <sup>5</sup>                                                                                | -                                                                                                   |
| <i>Thymelaea hirsuta</i>                            | w/w  | Aphek <sup>1, 2</sup>                                                                                                       | Aphek <sup>1, 2</sup><br>Ashkelon <sup>2, 5</sup><br>Ekron <sup>2</sup>                              | Aphek <sup>2</sup>                                                                                  |
| <i>Thymelaea passerina</i>                          | w/w  | Batash <sup>13</sup><br>Beth Shean <sup>14</sup><br>Ekron <sup>2</sup><br>Megiddo <sup>8</sup><br>Safi/Gath <sup>2, 4</sup> | Aphek <sup>1, 2</sup><br>Ashkelon <sup>2, 5</sup><br>Ekron <sup>2</sup><br>Safi/Gath <sup>2, 4</sup> | Beth Shean <sup>7</sup><br>Megiddo <sup>8</sup><br>Rosh Zayit <sup>19</sup><br>Shiloh <sup>20</sup> |
| <i>Torilis</i> sp.                                  |      | Ekron <sup>2</sup>                                                                                                          | -                                                                                                    | Rosh Zayit <sup>19</sup>                                                                            |
| <i>Trifolium arvense</i>                            | w/w  | Beth Shean <sup>14</sup>                                                                                                    | -                                                                                                    | -                                                                                                   |
| <i>Trifolium berytheum</i>                          | w/w  | Batash <sup>13</sup>                                                                                                        | -                                                                                                    | -                                                                                                   |
| <i>Trifolium clusii</i>                             | w/w  | -                                                                                                                           | Aphek <sup>1, 2</sup>                                                                                | -                                                                                                   |
| <i>Trifolium spumosum</i>                           | w/w  | -                                                                                                                           | Aphek <sup>1, 2</sup>                                                                                | -                                                                                                   |
| <i>Trifolium</i> sp.                                |      | Megiddo <sup>8</sup>                                                                                                        | Aphek <sup>1, 2</sup>                                                                                | Beth Shean <sup>7</sup><br>Megiddo <sup>8</sup><br>Rosh Zayit <sup>19</sup>                         |
| <i>Trigonella arabica</i>                           | w/w  | Shiqmim <sup>6</sup>                                                                                                        | -                                                                                                    | -                                                                                                   |
| <i>Trigonella foenum-graecum</i>                    | w/w  | Batash <sup>13</sup><br>Ekron <sup>2</sup>                                                                                  | Ashkelon <sup>5</sup>                                                                                | Lachish <sup>26</sup>                                                                               |
| <i>Trigonella foenum-graecum/berlythea</i>          | w/w  | -                                                                                                                           | Aphek <sup>1, 2</sup>                                                                                | -                                                                                                   |
| <i>Trigonella hierosolymitana</i>                   | w/w  | -                                                                                                                           | Aphek <sup>1, 2</sup>                                                                                | -                                                                                                   |
| <i>Trigonella</i> sp.                               | w/w  | Aphek <sup>1, 2</sup><br>Batash <sup>13</sup>                                                                               | Aphek <sup>1, 2</sup>                                                                                | -                                                                                                   |
| <i>Triticum/Aegilops</i>                            |      | Ashdod <sup>32</sup>                                                                                                        | -                                                                                                    | -                                                                                                   |
| <i>Triticum aestivum</i>                            | cult | Arad <sup>21</sup><br>Jericho <sup>18</sup><br>Megiddo <sup>8</sup>                                                         | -                                                                                                    | Megiddo <sup>8</sup>                                                                                |
| <i>Triticum compactum</i>                           | cult | -                                                                                                                           | -                                                                                                    | Lachish <sup>26</sup>                                                                               |
| <i>Triticum dicoccum/monococcum</i>                 | cult | Jericho <sup>18</sup>                                                                                                       | -                                                                                                    | -                                                                                                   |
| <i>Triticum durum</i> subsp. <i>horanicum</i>       | cult | -                                                                                                                           | -                                                                                                    | Keisan <sup>23</sup>                                                                                |
| <i>Triticum monococcum</i> subsp. <i>monococcum</i> | cult | Arad <sup>21</sup><br>Jericho <sup>37</sup>                                                                                 | -                                                                                                    | Lachish <sup>26</sup>                                                                               |
| <i>Triticum turgidum</i> subsp. <i>dicoccoides</i>  | w/w  | Arad <sup>21</sup><br>Jericho <sup>18</sup>                                                                                 | -                                                                                                    | -                                                                                                   |
| <i>Triticum turgidum</i> subsp. <i>dicoccum</i>     | cult | Afula <sup>17</sup><br>Aphek <sup>1, 2</sup>                                                                                | Aphek <sup>1, 2</sup><br>Ashkelon <sup>2, 10, 11, 5</sup>                                            | Aphek <sup>1, 2</sup><br>Beth Shean <sup>7</sup>                                                    |

|                                                             |      |                                                                                                                                                                                                                                                             |                                                                                                              |                                                                                                                                                                               |
|-------------------------------------------------------------|------|-------------------------------------------------------------------------------------------------------------------------------------------------------------------------------------------------------------------------------------------------------------|--------------------------------------------------------------------------------------------------------------|-------------------------------------------------------------------------------------------------------------------------------------------------------------------------------|
|                                                             |      | Arad <sup>21</sup><br>Batash <sup>13</sup><br>Beth Shean <sup>14</sup><br>Ekron <sup>2</sup><br>Ifshar <sup>15, 29, 16</sup><br>Jericho <sup>18</sup><br>Lachish <sup>26</sup><br>Megiddo <sup>8</sup><br>Safi/Gath <sup>2, 4</sup><br>Shiqmim <sup>6</sup> | Ekron <sup>2</sup><br>Qasile <sup>28</sup><br>Safi/Gath <sup>2, 4</sup>                                      | Ifshar <sup>15</sup><br>Keisan <sup>23</sup><br>Lachish <sup>26</sup><br>Megiddo <sup>8</sup><br>Rosh Zayit <sup>19</sup>                                                     |
| <i>Triticum turgidum</i> subsp. <i>dicoccum/parvicoccum</i> | cult | Batash <sup>13</sup>                                                                                                                                                                                                                                        | -                                                                                                            | -                                                                                                                                                                             |
| <i>Triticum turgidum</i> subsp. <i>parvicoccum</i>          | cult | Afula <sup>17</sup><br>Aphek <sup>1, 2</sup><br>Batash <sup>13</sup><br>Beth Shean <sup>14</sup><br>Ekron <sup>2</sup><br>Ifshar <sup>15, 29, 16</sup><br>Manahat <sup>3</sup><br>Safi/Gath <sup>2, 4</sup><br>Shiloh <sup>20</sup>                         | Aphek <sup>1, 2</sup><br>Ashkelon <sup>2, 10, 11, 5</sup><br>Ekron <sup>2</sup><br>Safi/Gath <sup>2, 4</sup> | Aphek <sup>1, 2</sup><br>Beth Shean <sup>7, 25</sup><br>Ifshar <sup>15</sup><br>Rosh Zayit <sup>19</sup><br>Shiloh <sup>20</sup>                                              |
| <i>Triticum</i> sp.                                         |      | Beth Shean <sup>14</sup><br>Ta'anach <sup>9</sup>                                                                                                                                                                                                           | -                                                                                                            | Arad <sup>27</sup><br>Be'er Sheba <sup>27</sup><br>City of David <sup>12</sup><br>Megiddo <sup>8</sup><br>Ta'anach <sup>9</sup>                                               |
| <i>Vaccaria hispanica</i>                                   | w/w  | Batash <sup>13</sup>                                                                                                                                                                                                                                        | -                                                                                                            | Shiloh <sup>20</sup>                                                                                                                                                          |
| <i>Valerianella muricata</i>                                | w/w  | Beth Shean <sup>14</sup>                                                                                                                                                                                                                                    | Ashkelon <sup>2</sup>                                                                                        | Beth Shean <sup>7</sup>                                                                                                                                                       |
| <i>Verbena officinalis</i>                                  | w/w  | Megiddo <sup>8</sup>                                                                                                                                                                                                                                        | -                                                                                                            | Megiddo <sup>8</sup>                                                                                                                                                          |
| <i>Veronica</i> sp.                                         | w/w  | Jericho <sup>18</sup>                                                                                                                                                                                                                                       | -                                                                                                            | -                                                                                                                                                                             |
| <i>Vicia ervilia</i>                                        | w/w  | Aphek <sup>1, 2</sup><br>Ashdod <sup>32</sup><br>Batash <sup>13</sup><br>Ekron <sup>2</sup><br>Ifshar <sup>15, 29, 16</sup><br>Jericho <sup>18</sup><br>Manahat <sup>3</sup><br>Megiddo <sup>8</sup><br>Shiloh <sup>20</sup>                                | Aphek <sup>1, 2</sup><br>Ashkelon <sup>2, 10, 11, 5</sup><br>Ekron <sup>2</sup><br>Safi/Gath <sup>2, 4</sup> | Afula <sup>24</sup><br>Aphek <sup>1, 2</sup><br>Ifshar <sup>15</sup><br>Keisan <sup>23</sup><br>Megiddo <sup>8</sup><br>Shiloh <sup>20</sup>                                  |
| <i>Vicia faba</i>                                           | cult | Aphek <sup>1, 2</sup><br>Ashdod <sup>32</sup><br>Batash <sup>13</sup><br>Ekron <sup>2</sup><br>Ifshar <sup>15</sup><br>Megiddo <sup>8</sup><br>Safi/Gath <sup>2, 4</sup>                                                                                    | Aphek <sup>1, 2</sup><br>Ekron <sup>2</sup><br>Qasile <sup>28</sup><br>Safi/Gath <sup>2, 4</sup>             | Afula <sup>24</sup><br>Aphek <sup>1, 2</sup><br>Ifshar <sup>15, 29</sup><br>Lachish <sup>26</sup><br>Megiddo <sup>8</sup><br>Rosh Zayit <sup>19</sup><br>Shiloh <sup>20</sup> |
| <i>Vicia galilaea</i>                                       | w/w  | Shiloh <sup>20</sup>                                                                                                                                                                                                                                        | -                                                                                                            | -                                                                                                                                                                             |
| <i>Vicia narbonensis</i>                                    | w/w  | -                                                                                                                                                                                                                                                           | -                                                                                                            | Rosh Zayit <sup>19</sup>                                                                                                                                                      |
| <i>Vicia narbonensis/Pisum</i>                              | w/w  | Batash <sup>13</sup>                                                                                                                                                                                                                                        | Qasile <sup>28</sup>                                                                                         | -                                                                                                                                                                             |
| <i>Vicia palaestina</i>                                     | w/w  | Ifshar <sup>15, 16</sup>                                                                                                                                                                                                                                    | -                                                                                                            | Ifshar <sup>16</sup>                                                                                                                                                          |
| <i>Vicia sativa</i>                                         | cult | Jericho <sup>18</sup>                                                                                                                                                                                                                                       | -                                                                                                            | -                                                                                                                                                                             |
| <i>Vicia</i> sp.                                            |      | Aphek <sup>2</sup><br>Arad <sup>21</sup><br>Ekron <sup>2</sup><br>Jericho <sup>18</sup><br>Lachish <sup>26</sup><br>Ta'anach <sup>9</sup>                                                                                                                   | Aphek <sup>2</sup><br>Ashkelon <sup>2, 5</sup><br>Ekron <sup>2</sup>                                         | Aphek <sup>2</sup><br>City of David <sup>12</sup><br>Lachish <sup>26</sup>                                                                                                    |

|                                                |              |                                                                                                                                                                                                                                                                                                                                                       |                                                                                                                                      |                                                                                                                                                           |
|------------------------------------------------|--------------|-------------------------------------------------------------------------------------------------------------------------------------------------------------------------------------------------------------------------------------------------------------------------------------------------------------------------------------------------------|--------------------------------------------------------------------------------------------------------------------------------------|-----------------------------------------------------------------------------------------------------------------------------------------------------------|
| <i>Vigna luteola</i>                           | w/w          | -                                                                                                                                                                                                                                                                                                                                                     | Ashkelon <sup>2, 34, 5</sup>                                                                                                         | -                                                                                                                                                         |
| <i>Vitex agnus-castus</i> and <i>Vitex</i> sp. | w/w          | Aphek <sup>1, 2</sup><br>Ekron <sup>2</sup>                                                                                                                                                                                                                                                                                                           | Aphek <sup>1, 2</sup><br>Ashkelon <sup>2, 5</sup><br>Ekron <sup>2</sup>                                                              | Aphek <sup>1, 2</sup>                                                                                                                                     |
| <i>Vitis vinifera</i>                          | cult         | Aphek <sup>1, 2</sup><br>Arad <sup>21</sup><br>Ashdod <sup>32</sup><br>Batash <sup>13</sup><br>Beth Shean <sup>14</sup><br>Ekron <sup>2</sup><br>Ifshar <sup>29</sup><br>Jericho <sup>18</sup><br>Lachish <sup>26</sup><br>Manahat <sup>3</sup><br>Megiddo <sup>8</sup><br>Safi/Gath <sup>2, 4</sup><br>Shiloh <sup>20</sup><br>Ta'anach <sup>9</sup> | Aphek <sup>1, 2</sup><br>Ashkelon <sup>2, 10, 11, 5</sup><br>Ekron <sup>2</sup><br>Qasile <sup>28</sup><br>Safi/Gath <sup>2, 4</sup> | Aphek <sup>1, 2</sup><br>City of David <sup>12</sup><br>Lachish <sup>26</sup><br>Megiddo <sup>8</sup><br>Rosh Zayit <sup>19</sup><br>Shiloh <sup>20</sup> |
| <i>Total for BA FL: NN of taxa =</i>           | 178          |                                                                                                                                                                                                                                                                                                                                                       |                                                                                                                                      |                                                                                                                                                           |
| <i>    NN of species (%) =</i>                 | 115<br>(65%) |                                                                                                                                                                                                                                                                                                                                                       |                                                                                                                                      |                                                                                                                                                           |
| <i>    NN of cult. =</i>                       | 22 (12%)     |                                                                                                                                                                                                                                                                                                                                                       |                                                                                                                                      |                                                                                                                                                           |
| <i>    NN of w/w =</i>                         | 121<br>(68%) |                                                                                                                                                                                                                                                                                                                                                       |                                                                                                                                      |                                                                                                                                                           |
| <i>Total for IA FL: NN of taxa =</i>           | 271          |                                                                                                                                                                                                                                                                                                                                                       |                                                                                                                                      |                                                                                                                                                           |
| <i>    NN of species =</i>                     | 190<br>(70%) |                                                                                                                                                                                                                                                                                                                                                       |                                                                                                                                      |                                                                                                                                                           |
| <i>    NN of cult. =</i>                       | 29 (11%)     |                                                                                                                                                                                                                                                                                                                                                       |                                                                                                                                      |                                                                                                                                                           |
| <i>    NN of w/w =</i>                         | 202<br>(75%) |                                                                                                                                                                                                                                                                                                                                                       |                                                                                                                                      |                                                                                                                                                           |

- 1 Kislev, M. E. & Mahler-Slasky, Y. in *Aphek-Antipatris II: The Remains on the Acropolis. Bronze and Iron Age Remains from Areas X, A and G* Vol. 27 *Monograph Series* (eds Gadot, Y. & Yadin, E.) 499-525 (The Institute of Archaeology, Tel-Aviv University, 2009).
- 2 Mahler-Slasky, Y. *Philistine material culture as reflected by the archaeobotanical remnants from Ashkelon, Ekron, Gath and Aphek*. PhD thesis, Bar-Ilan University, Israel (2004).
- 3 Kislev, M. E. in *Villages, Terraces and Stone Mounds: Excavations at Manahat* Vol. 3 (eds Edelstein, G. Milevski, I. & Aurant, S.) 113-118 (Israel Antiquities Authority Reports 1998).
- 4 Mahler-Slasky, Y. & Kislev, M. E. in *Tell es-Safi I: Report on the 1996-2005 Seasons* Vol. ÄAT 69 (ed Maeir, A.) 579-587 (2012).
- 5 Weiss, E., Kislev, M. E. & Mahler-Slasky, Y. in *Ashkelon 3: The Seventh Century B.C.* (eds Stager, L.E. Master, D.M. & Schloen, J.D.) 591-613 (Eisenbrauns, 2011).
- 6 Kislev, M. E. in *Shiqmim I, Studies Concerning Chalcolithic Societies in the Northern Negev Desert, Israel (1982-1984)* Vol. 356 (i, ii) (ed Levy, T.E.) 251-279, 549-563 (BAR International Series, 1987).
- 7 Simchoni, O. & Kislev, M. E. in *Excavations at Tel Beth-Shean 1989-1996* Vol. I (ed Mazar, A.) 679-685 (The Israel Exploration Society and the Institute of Archaeology, HJ 2006).
- 8 Borojevic, K. in *Megiddo IV: the 1998-2002 Seasons* Vol. 24 *Monograph Series of the Institute of Archaeology University of Tel-Aviv*, Ch. 27, 519-541 (2006).
- 9 Liphshitz, N. & Waisel, Y. Dendroarchaeological investigations in Israel (Taanach). *Israel Exploration Journal* **30**, 132-136 (1980).
- 10 Weiss, E. & Kislev, M. E. in *Ashkelon: A City on the Seashore* (eds Sasson, A. Safrai, Z. & Sagiv, N.) 6-7 (Ashkelon Academic College, 2001).

- 11 Weiss, E. & Kislev, M. E. Plant remains as indicators for economic activity: a case study from Iron Age  
Ashkelon. *Journal of Archaeological Science* **31**, 1-13 (2004).
- 12 Liphshitz, N., Waisel, Y., Fahn, A., Werker, E. & Baruch, U. in *Excavations at the City of David 1978-1985*  
*Directed by Yigal Shiloh. Vol. III. Stratigraphic, Environmental, and Other Reports.* Qedem 33 (eds de Groot, A. ,  
& Ariel, D.T.) 105-121 (Institute of Archaeology, The Hebrew University of Jerusalem, 1992).
- 13 Kislev, M. E., Melamed, Y. & Langsam, Y. in *Tinnah (Tel Batash) III: The Finds from the Second Millennium*  
*BCE Vol. 45 Qedem* (eds Panitz-Cohen, N. & Mazar, A.) 295-311 (The Hebrew University, 2006).
- 14 Simchoni, O., Kislev, M. E. & Melamed, Y. in *Excavations at Tel Bet-Shean 1989-1996. Vol. II, the Middle and*  
*Late Bronze Age strata in Area R* (eds Mazar, A. & Mullins, R.A.) 702-715 (The Israel Exploration Society and  
The Institute of Archaeology, The Hebrew University, 2007).
- 15 Chernoff, M. C. *The Archaeobotanical Material from Tel el Ifshar*, PhD thesis, Brandeis University (1988).
- 16 Chernoff, M. C. Natural Resource Use in an Ancient Near East Farming Community. *Agricultural History* **66**,  
213-220 (1992).
- 17 Melamed, Y. Dry and charred grains from 'Afula - a taphonomic approach. *Atiqot* **30**, 69-70 (1996).
- 18 Hopf, M. in *Excavations at Jericho* (eds Kenyon, K. M. & Holland, T. A.) 576-621 (British School of  
Archaeology in Jerusalem, 1983).
- 19 Kislev, M. E. & Melamed, Y. in *Horbat Rosh Zayit: an Iron Age storage fort and village* Vol. 8 (eds Gal, Z. &  
Alexandre, Y.) 206-220 (Israel Antiquities Authority Reports 2000).
- 20 Kislev, M. E. in *Shiloh: The Archaeology of a Biblical Site* (eds Finkelstein, I. Bunimovich, S. & Lederman, Z.)  
354-361 (Institute of Archaeology of Tel Aviv University, 1993 ).
- 21 Hopf, M. in *Early Arad I, the Chalcolithic Settlement and Early Bronze City* (ed Amiran, R.) 64-82 (The Israel  
Exploration Society, 1978).
- 22 Simchoni, O. & Kislev, M. E. Early finds of *Celtis australis* in southern Levant. *Vegetation History and*  
*Archaeobotany*. **20**, 267-271 (2011).
- 23 Kislev, M. E. in *Tell Keisan (1971-1976): Une cité phénicienne en Galilée* (eds Briend, J. & Humbert, J.-B.) 361-  
379, pl. 139-140 (Orbis Biblicus et Orientalis, Series Archaeologica 1, 1980).
- 24 Zaitschek, D. V. Remains of cultivated plants from Afula. *Atiqot* **1**, 71-74 (1995).
- 25 Kislev, M. E., Simchoni, O., Melamed, Y. & Maoz, L. Flax seed production: evidence from the early Iron Age  
site of Tel Beth-Shean, Israel and from written sources. *Vegetation History and Archaeobotany*. **20**, 569-584  
(2011).
- 26 Helbaek, H. in *Lachish (Tell ed-Duweir) IV: The Bronze Age* (ed Olga Tufnell) 309-317 (Oxford University Press,  
1958).
- 27 Liphshitz, N. & Waisel, Y. Dendroarchaeological investigations in Israel (Tel Beersheba and Arad in the  
Northern and Eastern Negev. *Israel Exploration Journal* **23**, 30-36 (1973).
- 28 Kislev, M. E. & Hopf, M. Food remains from Tell Qasile: with special reference to *Lathyrus sativus/ cicera*. 140-  
147 (The Institute of Archaeology. The Hebrew University, Jerusalem, 1985).
- 29 Chernoff, M. C. & Paley, S. M. Dynamics of Cereal Production at Tell el Ifshar during the Middle Bronze Age.  
*Journal of Field Archaeology* **25**, 397-416 (1998).
- 30 Kislev, M. E. in *Jerusalem and Eretz Israel* (eds Schwarz, J. Amar, Z. & Ziffer, I.) 23-30 (Eretz Israel Museum,  
2000).
- 31 Hopf, M. & Zachariae, G. Determination of Botanical and Zoological Remains from Ramat Matred and Arad.  
*Israel Exploration Journal* **21**, 60-64 (1971).
- 32 Melamed, Y. Botanical remains from the excavation on the southern beach of Ashdod. *Atiqot* **74**, 127-131 (2013).
- 33 Kislev, M. E., Artzy, M. & Marcus, E. Import of an Aegean food plant to a Middle Bronze IIA coastal site in  
Israel. *Levant* **25**, 145-154 (1993).
- 34 Mahler-Slasky, Y. & Kislev, M. E. *Lathyrus* consumption in late Bronze and iron age sites in Israel: an Aegean  
affinity. *Journal of Archaeological Science* **37**, 2477-2485, doi:DOI: 10.1016/j.jas.2010.05.008 (2010).
- 35 Liphshitz, N. in *Excavations at Tel Dalit: an Early Bronze Age Walled Town in Central Israel* (ed Gophna, R.)  
186-192 (1996).
- 36 Borojevic, K. Interpreting, dating, and reevaluating the botanical assemblage from tell Kedesh: a case study of  
historical contamination. *Journal of Archaeological Science* **38**, 829-842,  
doi:<http://dx.doi.org/10.1016/j.jas.2010.11.005> (2011).
- 37 Hopf, M. in *Domestication and Exploitation of Plants and Animals* (eds Ucko, P.J. & Dumbleby, G.W.) 355-359  
(Aldine, 1969).



### SI 3 Evaluation of Possible Link Between Species Ubiquity and Sample Size

The data base for archaeobotanical samples of seeds and fruits from the Bronze Age, Philistine Iron Age Strata, and non-Philistine Iron Age strata examined in this study comprises identifications of 447 plant taxa determined to the species level and below.

To resolve the problem of possible link between sample size and species richness, we ran a Rarefaction test on the plant data base using the PAST statistical package (Hammer et al. 2001). As noted by Magurran (1991), Rarefaction addresses the issue of unequal sample sizes by calculating the numbers of species expected in each sample as if all samples were the same size. This test assumes that the sampled objects are randomly distributed in an environment, they are taxonomically similar and that sampling was carried out in the same manner.

**Figure SI 3. Graph showing rarefaction curves for plant remain counts (X axis) by FL against numbers of plant taxa (Y axis).**

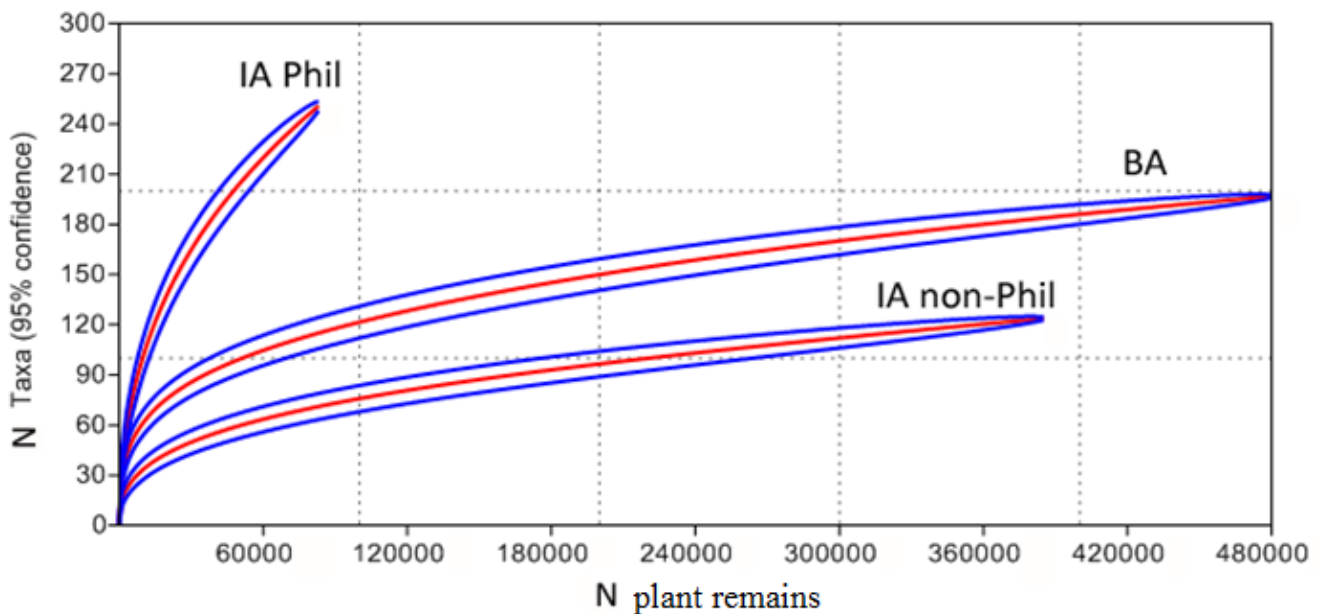

The red line (Fig. SI 3) represents the calculated rarefaction curve for each period, which is a plot of the number of species as a function of the number of specimens (seeds and fruit), while the blue lines represent the 95% confidence limits calculated for each.

The rarefaction curves initially follow a steep slope as the most common species are found. Thereafter they flatten out to form a plateau as the most common species have been sampled and only the rarest species remain to be sampled. As illustrated in the graph, the curves for the Bronze Age and Iron Age non-Philistine FL follow such a pattern. They both flatten out to the right indicating that a reasonable number of individual samples have been examined and that more intensive sampling will yield only few additional species. Moreover, the difference in taxon number between these two samples, indicates that unrelated to sample size, fewer taxa are found in the non-Philistine Iron Age sample.

In contrast, the Iron Age Philistine FL on the left follows a different trajectory, with a steep slope on the left that does not flatten out to the right. This indicates that a large portion of the species diversity still remains to be discovered. While taxon diversity is beginning to flatten out at ca. 60,000 specimens for the two other periods, the curve is still rising for the Iron Age Philistine sample so that it lies far above that for both the Bronze Age and non-Philistine Iron Age FLs.

Clearly, the Iron Age Philistine assemblage contains a significantly higher number of species that will increase further, given a larger sample size. One can extrapolate the trajectory of this curve by extending the line, such that when a sample size of 180,000 specimens is attained, taxon number would reach ca. 300. These results demonstrate that the higher plant diversity in the Iron Age Philistine assemblages is not an artifact of sample size but a true reflection of the composition of the floral assemblage.

## References

Hammer Ø., Harper D.A.T. & Ryan P.D. Past: Paleontological Statistics Software Package for Education and Data Analysis. *Palaeontological Electronica* 4 (1), article 4, 9 pp. (2001).  
[http://palaeo-electronica.org/2001\\_1/pastissue1\\_01.htm](http://palaeo-electronica.org/2001_1/pastissue1_01.htm)

Magurran A.E. *Ecological Diversity and its Measurement*. 2nd edn. (Chapman and Hall, 1991).
